# Supplementary material for: Urban–rural disparity in prevalence of multimorbidity in China: a cross-sectional nationally representative study
Source: PubMed Central journal article supplement — BMJ Open. 2020 Nov 16;10(11):e038404. doi: 10.1136/bmjopen-2020-038404 (PMC7670952; doi:10.1136/bmjopen-2020-038404), 2020-11-16
Supplement: bmjopen-2020-038404.draft_revisions.pdf [file bmjopen-2020-038404.draft_revisions.pdf]

# BMJ Open

BMJ Open is committed to open peer review. As part of this commitment we make the peer review history of every article we publish publicly available.

When an article is published we post the peer reviewers' comments and the authors' responses online. We also post the versions of the paper that were used during peer review. These are the versions that the peer review comments apply to.

The versions of the paper that follow are the versions that were submitted during the peer review process. They are not the versions of record or the final published versions. They should not be cited or distributed as the published version of this manuscript.

BMJ Open is an open access journal and the full, final, typeset and author-corrected version of record of the manuscript is available on our site with no access controls, subscription charges or pay-per-view fees (<http://bmjopen.bmj.com>).

If you have any questions on BMJ Open's open peer review process please email [info.bmjopen@bmj.com](mailto:info.bmjopen@bmj.com)

# BMJ Open

## **Rurality associated with a higher prevalence of multimorbidity in middle-aged and elderly Chinese: findings from the China Health and Retirement Longitudinal Study (2015-2016)**

|                               |                                                                                                                                                                                                                                                                      |
|-------------------------------|----------------------------------------------------------------------------------------------------------------------------------------------------------------------------------------------------------------------------------------------------------------------|
| Journal:                      | <i>BMJ Open</i>                                                                                                                                                                                                                                                      |
| Manuscript ID                 | bmjopen-2020-038404                                                                                                                                                                                                                                                  |
| Article Type:                 | Original research                                                                                                                                                                                                                                                    |
| Date Submitted by the Author: | 12-Mar-2020                                                                                                                                                                                                                                                          |
| Complete List of Authors:     | Ma, Xiaochen; Peking University, China Center for Health Development Studies<br>He, Yu; London School of Hygiene & Tropical Medicine, Department of Non-communicable Disease Epidemiology<br>Xu, Jin; Peking University, China Center for Health Development Studies |
| Keywords:                     | EPIDEMIOLOGY, GERIATRIC MEDICINE, PUBLIC HEALTH, Depression & mood disorders < PSYCHIATRY                                                                                                                                                                            |
|                               |                                                                                                                                                                                                                                                                      |

SCHOLARONE™  
Manuscripts

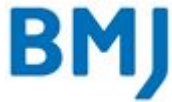

I, the Submitting Author has the right to grant and does grant on behalf of all authors of the Work (as defined in the below author licence), an exclusive licence and/or a non-exclusive licence for contributions from authors who are: i) UK Crown employees; ii) where BMJ has agreed a CC-BY licence shall apply, and/or iii) in accordance with the terms applicable for US Federal Government officers or employees acting as part of their official duties; on a worldwide, perpetual, irrevocable, royalty-free basis to BMJ Publishing Group Ltd ("BMJ") its licensees and where the relevant Journal is co-owned by BMJ to the co-owners of the Journal, to publish the Work in this journal and any other BMJ products and to exploit all rights, as set out in our [licence](#).

The Submitting Author accepts and understands that any supply made under these terms is made by BMJ to the Submitting Author unless you are acting as an employee on behalf of your employer or a postgraduate student of an affiliated institution which is paying any applicable article publishing charge ("APC") for Open Access articles. Where the Submitting Author wishes to make the Work available on an Open Access basis (and intends to pay the relevant APC), the terms of reuse of such Open Access shall be governed by a Creative Commons licence – details of these licences and which [Creative Commons](#) licence will apply to this Work are set out in our licence referred to above.

Other than as permitted in any relevant BMJ Author's Self Archiving Policies, I confirm this Work has not been accepted for publication elsewhere, is not being considered for publication elsewhere and does not duplicate material already published. I confirm all authors consent to publication of this Work and authorise the granting of this licence.

1  
2  
3 **[Title page]**

4 **Title of the article: Rurality associated with higher prevalence of multimorbidity**  
5 **in middle-aged and elderly Chinese: findings from the China Health and**  
6 **Retirement Longitudinal Study (2015-2016)**  
7  
8

9  
10 **The corresponding author:**

11 Full name: Jin Xu

12 Postal address: No. 38, Xueyuan Road, Haidian, Beijing, 100191, China

13 E-mail: xujin@hsc.pku.edu.cn

14 Telephone number: 0086-10-82805701  
15  
16

17 **Full name, department, institution, city and country of all co-authors:**

18 First author: Xiaochen Ma

19 Department: China Center for Health Development Studies

20 Institution: Peking University

21 Country: China  
22  
23

24  
25 Second author: Yu He

26 Department: Department of Non-communicable Disease Epidemiology

27 Institution: London School of Hygiene & Tropical Medicine

28 Country: United Kingdom  
29  
30

31  
32 Third author: Jin Xu

33 Department: China Center for Health Development Studies

34 Institution: Peking University

35 Country: China  
36  
37

38 **Word count, excluding title page, abstract, references, figures and tables: 1841**  
39  
40

41 **Keywords:** multimorbidity, prevalence, China, rural, elderly  
42  
43  
44  
45  
46  
47  
48  
49  
50  
51  
52  
53  
54  
55  
56  
57  
58  
59  
60

## Abstract

### Background

Epidemiological evidence about multimorbidity in low- and middle-income countries is lacking. We aimed to estimate the prevalence of multimorbidity among middle-aged and older adults in rural and urban China.

### Methods

We used a cross-sectional design and data from a nationally representative survey conducted in 2015–2016 among Chinese people aged 45 years or older involving 19,656 participants. Multimorbidity was measured with a cut-off point of having two or more among 14 chronic illnesses. 13 of them were based on self-reported physician diagnosis. In addition, depressive disorders were assessed with the 10-item Center for Epidemiologic Studies Depression Scale (CES-D 10). The weighted prevalence of multimorbidity was calculated, with a non-response adjustment. Multivariate logistic regression was applied to analyze the relationships between covariates and multimorbidity.

### Findings

Multimorbidity was highly prevalent (54.3%) among the studied population. Contrary to previous studies, we found the prevalence of multimorbidity to be higher among the rural dwellers (58.3%) than among the urban population (50.4%). After adjustment for covariates, rural residents had 7.5% higher odds (95% CI of odds ratio: [1.003, 1.151]) of having multimorbidity than their urban counterparts. Above 70% of chronic patients above 45 years old have multimorbidity, while 80.6%-97.9% of patients with any of the 14 chronic illnesses have multimorbidity.

### Interpretation

Future health system development in China should transform from preventing and controlling non-communicable diseases as individual diseases to addressing people's comprehensive health needs under multimorbidity. The rural population should be prioritized as they suffered more from multimorbidity than the urban population.

## [Article summary]

### Strengths and limitations of this study

- This is the first study showing that rurality is associated with higher prevalence of middle-aged and elderly Chinese.
- We used nationally representative sample of the people above the age of 45 in China.
- In our measurement of multimorbidity, we have included depression, a highly prevalent and important mental health condition in China but ignored in previous studies.
- We used self-reported measurement for 13 of the 14 chronic illnesses studied, which is likely to cause underreporting as previous studies using administrative data reported higher prevalence of multimorbidity.
- The lower accessibility to health care for chronic illnesses for rural population than for urban population means that the study has probably underestimated the prevalence of multimorbidity rural population.

## [Main text]

### 1. Introduction:

As global life expectancy rises, there is an increasing number of middle-aged and elderly with chronic illnesses. The co-occurrence of two or more chronic illnesses within a person is defined as multimorbidity.<sup>1</sup> Multimorbidity is a strong predictor of mortality.<sup>2</sup> It is also associated with reduced functional independence,<sup>3,4</sup> poor quality of life and well-being.<sup>5,6</sup> Multimorbidity also accounts for a disproportionately large share of health care utilizations and expenditures.<sup>7,8</sup> The implications go beyond extra spending. As most health systems were designed based on single diseases, issues, such as poly-pharmacy, pose enormous challenges for care coordination and patients' self-management.<sup>9</sup>

Epidemiological evidence about the situation in low- and middle-income countries is lacking.<sup>10</sup> We conducted a systematic literature search on PubMed and Web of Science for published papers on prevalence of multimorbidity in China on 31 January 2020. We used search terms related to multimorbidity, prevalence and China and did not apply language restrictions. Our search resulted in one systematic review published in 2015 and three more recent papers. Previous work predominantly focused on urban populations. However, the poorer access to quality care than that enjoyed by their urban counterparts<sup>24</sup> means the rural population with chronic illnesses were at a higher risk of developing multimorbidity. The only two papers reporting national prevalence of multimorbidity had serious flaws in neglecting depression<sup>11,12</sup>, a most prevalent mental health condition among Chinese<sup>13</sup> and a condition widely used in previous international multimorbidity studies.<sup>14,15</sup>

While lack of scholarly focus on rural multimorbidity hinders the development of equity- and needs-oriented health policies, the neglect of depression means substantial underestimation of the prevalence of multimorbidity and its consequences for health and wellbeing. To address this important gap in knowledge, this paper aimed to provide an estimation of national prevalence of multimorbidity among adults above 45 years old in China with a particular focus on the urban-rural disparity.

### 2. Methods

#### *Study design and participants*

The study used a cross-sectional design and data from the China Health and Retirement Longitudinal Study (CHARLS). The survey is nationally representative and longitudinal, covering adults aged 45 years or older. It includes assessments of social, economic and health circumstances of community residents. The detailed cohort profile was previously published. The participants of CHARLS closely resembled the Chinese national census population in terms of demographic characteristics.<sup>16</sup>

We used data from the latest wave of CHARLS collected in 2015-2016. All participants provided written informed consent, and survey protocols were approved by the Ethics Review Board at Peking University.<sup>16</sup> Of the 19,656 participants, a total of 2751 (14.0%) contained missing observations in variables. In the dataset, a survey weight variable was created using household and individual non-response adjustment.

#### *Measurement of multimorbidity*

In line with previous systematic review and studies done in China,<sup>7,14,15</sup> we used a disease count approach

1  
2  
3 to measure multimorbidity. Following suggested cut-off point, a binary variable of coexistence of two or  
4 more chronic diseases/conditions within one individual constituted our main indication of multimorbidity.  
5 Partly due to the data restriction, the selection and definition of morbidities varies across previous  
6 multimorbidity studies, and no uniform operational measurement exists. We sought to include  
7 morbidities that were prevalent, which resulted in a list of 14 chronic illnesses. 13 chronic illnesses  
8 (hypertension, diabetes, cancer, lung disease, heart problem, stroke, arthritis, dyslipidemia, liver disease,  
9 kidney disease, stomach disease, asthma and memory problem) were assessed based on self-reported  
10 diagnosis by a doctor. In addition, depressive disorders were assessed with 10-item Center for  
11 Epidemiologic Studies Depression Scale (CES-D 10). In a sensitive analysis, an ordinal measure of  
12 multimorbidity (absence or single illness, two illnesses, three illnesses, four illnesses, five illnesses or  
13 more) was considered.  
14  
15  
16  
17  
18

### 19 ***Covariates***

20 Demographic and socioeconomic status covariates for this study included age (45-54 years old, 55-64  
21 years old, 65-74 years old, 75 years and above), sex (male or female), educational attainment (illiterate,  
22 partial primary school, completed primary school, middle school, and high school or above), marital  
23 status (married, otherwise), smoking status (current, former or never), alcohol drinking status (current,  
24 former or never), health insurance status (covered or not) and urbanity (urban or rural according to the  
25 household registration or *hukou*).  
26  
27  
28

### 29 ***Statistical analysis***

30 Frequencies (percentage) were reported to summarize the distribution of participants' characteristics.  
31 Weighted prevalence of individual chronic diseases and multimorbidity was calculated with adjustment  
32 of the survey weight. The distribution of multimorbidity by subpopulations was examined by stratified  
33 analysis of urbanity, sex and age groups. Multivariate logistic regression was applied to analyze the  
34 associations between covariates and the binary outcome of multimorbidity. A sensitivity analysis was  
35 conducted using ordered logit regressions to analyze the relationship between the same covariates and  
36 the ordinal outcome of multimorbidity.  
37  
38  
39  
40

### 41 **Results**

42  
43 Table 1 presents the characteristics of the study population and their weighted prevalence of  
44 multimorbidity. Among the 19,656 participants, the mean age was 60.2 years, 51.3% were female, and  
45 59.8% were from rural areas. 54.3% of the weighted sample had multimorbidity. Among the remainder,  
46 about half (22.8% of the sample) had only one of the 14 conditions, while the other half (22.9%) had  
47 none. The prevalence of multimorbidity generally increased as people aged.  
48  
49  
50  
51  
52  
53  
54  
55  
56  
57  
58  
59  
60



**Table 1. Characteristics of study population and weighted prevalence of multimorbidity**

|                               | N      | (%)     | Weighted Prevalence † |             |                        |
|-------------------------------|--------|---------|-----------------------|-------------|------------------------|
|                               |        |         | No illness            | One illness | Multi-morbidities (≥2) |
| Total                         | 19,656 | (100%)  | 22.9%                 | 22.8%       | 54.3%                  |
| Age (year)                    |        |         |                       |             |                        |
| 45-54                         | 6792   | (34.6%) | 35.0%                 | 26.3%       | 38.7%                  |
| 55-64                         | 6604   | (33.6%) | 19.3%                 | 23.2%       | 57.6%                  |
| 65-74                         | 4310   | (21.9%) | 13.7%                 | 19.1%       | 67.1%                  |
| ≥75                           | 1950   | (9.9%)  | 13.5%                 | 17.6%       | 68.9%                  |
| Sex                           |        |         |                       |             |                        |
| Male                          | 9573   | (48.7%) | 25.7%                 | 23.9%       | 50.4%                  |
| Female                        | 10083  | (51.3%) | 20.3%                 | 21.7%       | 58.0%                  |
| Educational level             |        |         |                       |             |                        |
| Illiterate                    | 4985   | (25.4%) | 15.8%                 | 22.5%       | 61.7%                  |
| Part of primary school        | 3252   | (16.6%) | 14.8%                 | 20.0%       | 65.2%                  |
| Primary school                | 5352   | (27.3%) | 32.7%                 | 22.8%       | 44.5%                  |
| Junior middle school          | 3804   | (19.4%) | 21.4%                 | 24.0%       | 54.5%                  |
| Senior middle school or above | 2237   | (11.4%) | 25.9%                 | 24.4%       | 49.7%                  |
| Unknown*                      | 26     | (0.1%)  |                       |             |                        |
| Marital status                |        |         |                       |             |                        |
| Not in marriage               | 2666   | (13.6%) | 15.6%                 | 17.8%       | 66.6%                  |
| Married                       | 16989  | (86.4%) | 24.2%                 | 23.6%       | 52.2%                  |
| Unknown*                      | 1      | (0.0%)  |                       |             |                        |
| Smoking                       |        |         |                       |             |                        |
| Current                       | 5568   | (28.4%) | 25.6%                 | 24.3%       | 50.1%                  |
| Former                        | 3112   | (15.9%) | 17.8%                 | 20.6%       | 61.5%                  |
| Never                         | 10929  | (55.7%) | 22.8%                 | 22.7%       | 54.5%                  |
| Unknown*                      | 47     | (0.2%)  |                       |             |                        |
| Alcohol consumption           |        |         |                       |             |                        |
| Current                       | 6947   | (35.5%) | 27.7%                 | 24.8%       | 47.6%                  |
| Former                        | 2213   | (11.3%) | 13.8%                 | 19.5%       | 66.7%                  |
| Never                         | 10427  | (53.2%) | 21.3%                 | 22.1%       | 56.6%                  |
| Unknown*                      | 69     | (0.4%)  |                       |             |                        |
| Health insurance status       |        |         |                       |             |                        |
| Covered                       | 15406  | (90.9%) | 16.2%                 | 22.0%       | 61.7%                  |
| Not covered                   | 1549   | (9.1%)  | 20.3%                 | 21.9%       | 57.7%                  |
| Unknown*                      | 2701   | (13.7%) |                       |             |                        |
| Urbanity                      |        |         |                       |             |                        |
| Urban                         | 7908   | (40.2%) | 26.7%                 | 23.0%       | 50.4%                  |
| Rural                         | 11748  | (59.8%) | 19.2%                 | 22.6%       | 58.3%                  |

Note: † Individual weight with household and individual non-response adjustment was used to calculate the weighted prevalence. \* “Unknown” means that no response from the interviewed participants was recorded for the question.

Figure 1 shows the weighted proportion of population subgroups by number of chronic illnesses, urbanity, sex and age. Except for male above 75 years old, prevalence of multimorbidity was consistently higher among rural population in all age groups in both sexes. Women, no matter urban or rural, were more likely to suffer from multimorbidity in all age groups. People in general were more likely to have more chronic illnesses as they aged. The trends became inconsistent when people became older than 75 years. Detailed prevalence is provided in Appendix Table 1.

[Please insert the image of Figure 1 here.]

**Figure 1. Weighted percentage of population subgroups by number of chronic illness, urbanity, sex and age**

Table 2 presents the factors associated with multimorbidity. In the multivariate logistic model, older age, being female, not in marriage, without education level of middle school or above, former smoking and alcohol drinking, health insurance coverage, and rural *hukou* were significantly associated with higher odds of having multimorbidity. In particular, after adjusting for age, sex, education, marital status, smoking, alcohol consumption, and insurance coverage, rural residents had 7.5% higher odds (95% CI of odds ratio: [1.003,1.151]) of having multimorbidity than urban residents. In the sensitivity analysis, multivariate ordered logistic model using an ordinal measure of multimorbidity yields similar pattern that rural residents had 6.4% higher likelihood (95% CI of odds ratio: [1.003,1.128]) of having multimorbidity compared with urban residents, adjusted for the same covariates (Appendix Table 2).

**Table 2. Odds ratios (OR) for multimorbidity by age, sex, marital status, education, former smoking and alcohol consumption, health insurance status and urbanity**

|                               | Logistic Model |               |
|-------------------------------|----------------|---------------|
|                               | Odds Ratio     | 95% CI        |
| Age (year)                    |                |               |
| 45-54                         | Reference      |               |
| 55-64                         | 1.546          | [1.428,1.674] |
| 65-74                         | 2.177          | [1.982,2.392] |
| ≥75                           | 1.908          | [1.676,2.173] |
| Sex                           |                |               |
| Male                          | Reference      |               |
| Female                        | 1.649          | [1.484,1.832] |
| Educational level             |                |               |
| Illiterate                    | Reference      |               |
| Part of primary school        | 1.150          | [1.039,1.274] |
| Primary school                | 1.077          | [0.974,1.190] |
| Junior middle school          | 0.932          | [0.840,1.034] |
| Senior middle school or above | 0.838          | [0.742,0.947] |
| Marital status                |                |               |
| Not in marriage               | Reference      |               |
| Married                       | 0.843          | [0.761,0.934] |
| Smoking                       |                |               |
| Current                       | Reference      |               |

|                     |           |               |
|---------------------|-----------|---------------|
| Former              | 1.478     | [1.336,1.634] |
| Never               | 0.956     | [0.862,1.061] |
| Alcohol consumption |           |               |
| Current             | Reference |               |
| Former              | 1.769     | [1.575,1.987] |
| Never               | 1.061     | [0.980,1.150] |
| Insurance coverage  |           |               |
| Covered             | Reference |               |
| Not covered         | 0.816     | [0.730,0.912] |
| Urbanity            |           |               |
| Urban               | Reference |               |
| Rural               | 1.075     | [1.003,1.151] |
| N                   |           | 16905         |

Note: Logistic model was applied for binary outcome which refers to 1 as coexistence of two or more chronic diseases and/or conditions within one person.

Table 3 reports the prevalence of multimorbidity among patients with one of the 14 conditions. It shows that both urban and rural population with chronic illnesses are predominantly having multimorbidity (80.6%-97.6% in urban population, 84.5%-97.9% in rural population). While prevalence of chronic conditions ranked differently among urban and rural residents, rural patients with one of 13 chronic illnesses studied were more likely to have multimorbidity than urban patients.

**Table 3. Prevalence of multimorbidity among patients with one of 14 chronic illnesses**

| Chronic diseases     | Prevalence | Prevalence of multimorbidity |       |       |
|----------------------|------------|------------------------------|-------|-------|
|                      |            | Total                        | Urban | Rural |
| Arthritis            | 42.8%      | 86.7%                        | 86.6% | 86.7% |
| Hypertension         | 34.6%      | 86.9%                        | 85.7% | 88.1% |
| Depressive disorders | 31.1%      | 83.0%                        | 80.6% | 84.5% |
| Stomach disease      | 31.0%      | 87.3%                        | 84.8% | 89.1% |
| Dyslipidemia         | 19.8%      | 91.4%                        | 89.8% | 94.2% |
| Heart problem        | 18.8%      | 94.4%                        | 93.3% | 95.8% |
| Lung disease         | 15.0%      | 92.8%                        | 92.4% | 93.1% |
| Diabetes             | 10.9%      | 94.0%                        | 93.1% | 95.4% |
| Kidney disease       | 10.2%      | 94.4%                        | 95.2% | 93.7% |
| Liver disease        | 7.4%       | 91.8%                        | 90.2% | 93.6% |
| Asthma               | 6.0%       | 97.6%                        | 97.6% | 97.7% |
| Heart problem        | 3.8%       | 96.6%                        | 95.4% | 97.9% |
| Memory problem       | 2.8%       | 94.6%                        | 94.1% | 95.1% |
| Cancer               | 1.9%       | 87.2%                        | 85.2% | 89.4% |

Note: Individual weight with household and individual non-response adjustment was used to calculate prevalence.

### 3. Discussion

Our study using nationally representative data revealed a high prevalence (54.3%) of multimorbidity among middle-aged or elderly adults in China. Extrapolating this figure to the entire national population of adults aged 45 or above, we estimate that there are over 240 million middle-aged or elderly Chinese with multimorbidity.<sup>17</sup> Our estimation of multimorbidity prevalence in China is higher than a previous estimation (42.4%) using a similar dataset. The main reason for the difference seems to be our inclusion of depression. As 24.7% of urban residents and 36.8% of rural residents above the age of 45 had depressive symptoms, depression is indeed a highly prevalent condition that merits inclusion in disease counts for multimorbidity. We also found that women were more likely to be multimorbid. In addition, multimorbidity is associated with a range of social and behavioral factors, such as lower education status, former smoking and alcohol consumption, being unmarried or divorced and lacking health insurance coverage. Most people with chronic illnesses are likely to be multimorbid. In other words, chronic illnesses rarely exist in a person as a single morbidity.

We found the prevalence of multimorbidity to be higher among the rural dwellers (58.3%) than among the urban population (50.4%) in 2015. This revised previous finding that urban residents (43%) are more likely to have multimorbidity than rural population (41%).<sup>11</sup> The higher prevalence of multimorbidity among rural residents than among urban residents is shown in almost all age groups in both sexes. Again, our inclusion of depression seemed to be the main reason that resulted in the higher prevalence among rural population in China. We have further shown that multimorbidity is more prevalent among rural patients with 13 of the 14 chronic illnesses studied than their urban counterparts.

Our findings have some important implications. First, given the prevalence of the multimorbidity epidemic and its dominance among chronic patients, it is imperative that China move from its current hospital-centric model with fragmented care across specialties and facilities towards an approach of people-centered integrated care built on strong primary care. Second, since rural population have higher prevalence of multimorbidity, priority for health system transformation (and related research) to address multimorbidity lies in the rural areas, where the needs are the greatest and service providers are less qualified and located more sparsely. Third, within the shorter life expectancy among rural population,<sup>18</sup> they also seem more severely affected by multimorbidity. The impact of multimorbidity on rural people's lives therefore deserves greater attention. Digital health solutions such as telemedicine may be potentially valuable in facilitating support for front-liner providers, patients and their care-givers. Fourth, one out of four Chinese aged 45 or above were affected by chronic physical illnesses and depression, with potentially severe consequences on their wellbeing. It is particularly important that mental health be integrated at an affordable cost to primary care.

The present study has two strengths. First, we used nationally representative sample of the people above the age of 45 in China. Second, we have included depression in our measurement of multimorbidity following the practice suggested in two systematic reviews.<sup>14,15</sup> There are also some limitations of the study. First, we used self-reported measurement for 13 of the 14 chronic illnesses studied. This is likely to cause underreporting as previous studies using administrative data reported higher prevalence of

1  
2  
3 multimorbidity.<sup>19-21</sup> Second, despite China's recent health system development which extended essential  
4 health care coverage to all its population, health care for chronic illnesses is still less accessible for rural  
5 population.<sup>22, 24</sup> This is likely to cause underdiagnosis of chronic illnesses in rural areas. Hence, the  
6 actual prevalence of rural multimorbidity might be even higher than the current estimate.  
7  
8  
9

#### 10 **4. Conclusion**

11 Our study estimated that over half of Chinese aged 45 years or above have two or more chronic medical  
12 conditions. Contrary to previous studies, we have provided clear evidence that multimorbidity is more  
13 prevalent among rural population (58.3%) than among their urban counterparts (50.4%). Above 70% of  
14 chronic patients have multimorbidity. The prevalence of multimorbidity among patients with any of the  
15 14 chronic illnesses included in this study was even higher and ranged between 80.6% and 97.9%.  
16 Critical among the rural-urban disparity in multimorbidity prevalence are depression. Future health  
17 system development in China should transform from preventing and controlling non-communicable  
18 diseases as individual diseases to addressing people's comprehensive health need under multimorbidity.  
19 The priority for such transformation is the rural areas.  
20  
21  
22  
23

#### 24 **Contributorship statement**

25 Jin Xu and Yu He did the literature review. Jin Xu and Xiaochen Ma did the study design. All authors  
26 participated in data analysis. Jin Xu and Ma Xiaochen jointly wrote the first drafts, and all authors  
27 provided comments and confirmed the finalized version.  
28  
29

#### 30 **Ethics statement**

31 We used data from the China Health and Retirement Longitudinal Study. The survey and protocols were  
32 approved by the Peking University Ethics Review Board.  
33  
34  
35

#### 36 **Funding statement**

37 The study is funded by Natural Science Foundation of China (No. 71804004). The funder of the study  
38 had no role in study design, data collection, data analysis, data interpretation, or writing of the report.  
39  
40

#### 41 **Data sharing statement**

42 All the data in the study are publicly available via the official website of the China Health and Retirement  
43 Longitudinal Study (<http://charls.pku.edu.cn/>).  
44  
45

#### 46 **Patient and Public Involvement statement**

47 Patients and the public were not directly involved in the development of the research question or outcome  
48 measures of the study, nor were they involved in study design and execution. There are no plans to  
49 disseminate the research to study participants.  
50  
51  
52  
53

#### 54 **References**

- 55 1. World Health Organization. World report on ageing and health. Geneva, Switzerland: World Health  
56 Organization, 2015.
- 57 2. Dugravot A, Fayosse A, Dumurgier J, et al. Social inequalities in multimorbidity, frailty, disability,  
58 and transitions to mortality: a 24-year follow-up of the Whitehall II cohort study. *Lancet Public Health*  
59  
60

- 2019; S2468-667(19)30226-9.
3. Marventano S, Ayala A, Gonzalez N, et al. Multimorbidity and functional status in community-dwelling older adults. *European journal of internal medicine* 2014; **25**(7): 610-6.
  4. Wang X-X, Lin W-Q, Chen X-J, et al. Multimorbidity associated with functional independence among community-dwelling older people: a cross-sectional study in Southern China. *Health and Quality of Life Outcomes* 2017; **15**(1): 73.
  5. Gu J, Chao J, Chen W, et al. Multimorbidity and health-related quality of life among the community-dwelling elderly: A longitudinal study. *Archives of gerontology and geriatrics* 2018; **74**: 133-40.
  6. Coventry PA, Dickens C, Todd C. How does mental-physical multimorbidity express itself in lived time and space? A phenomenological analysis of encounters with depression and chronic physical illness. *Social science & medicine* 2014; **118**: 108-18.
  7. Chen H, Cheng M, Zhuang Y, Broad JB. Multimorbidity among middle-aged and older persons in urban China: Prevalence, characteristics and health service utilization. *Geriatr Gerontol Int* 2018; **18**(10): 1447-52.
  8. Hopman P, Heins MJ, Korevaar JC, Rijken M, Schellevis FG. Health care utilization of patients with multiple chronic diseases in the Netherlands: Differences and underlying factors. *European journal of internal medicine* 2016; **35**: 44-50.
  9. Pearson-Stuttard J, Ezzati M, Gregg EW. Multimorbidity—a defining challenge for health systems. *The Lancet Public Health* 2019; **4**(12): e599-e600.
  10. Academy of Medical Sciences. Multimorbidity: a priority for global health research, 2018.
  11. Yao SS, Cao GY, Han L, et al. Prevalence and patterns of multimorbidity in a nationally representative sample of older Chinese: results from CHARLS. *J Gerontol A Biol Sci Med Sci* 2019.
  12. Zhang R, Lu Y, Shi L, Zhang S, Chang F. Prevalence and patterns of multimorbidity among the elderly in China: a cross-sectional study using national survey data. *BMJ open* 2019; **9**(8): e024268-e.
  13. Huang Y, Wang Y, Wang H, et al. Prevalence of mental disorders in China: a cross-sectional epidemiological study. *Lancet Psychiatry* 2019; **6**(3): 211-24.
  14. Prados-Torres A, Calderón-Larrañaga A, Hanco-Saavedra J, Poblador-Plou B, van den Akker M. Multimorbidity patterns: a systematic review. *Journal of Clinical Epidemiology* 2014; **67**(3): 254-66.
  15. Johnston MC, Crilly M, Black C, Prescott GJ, Mercer SW. Defining and measuring multimorbidity: a systematic review of systematic reviews. *European journal of public health* 2019; **29**(1): 182-9.
  16. Zhao Y, Hu Y, Smith JP, Strauss J, Yang G. Cohort profile: the China Health and Retirement Longitudinal Study (CHARLS). *International journal of epidemiology* 2014; **43**(1): 61-8.
  17. National Bureau of Statistics of China. China Statistical Yearbook 2016. Beijing, 2016.
  18. Zimmer Z, Kaneda T, Spess L. An examination of urban versus rural mortality in China using community and individual data. *J Gerontol B Psychol Sci Soc Sci* 2007; **62**(5): S349-S57.
  19. Chen H, Chen Y, Cui B. The association of multimorbidity with healthcare expenditure among the elderly patients in Beijing, China. *Arch Gerontol Geriatr* 2018; **79**: 32-8.
  20. Schäfer I, Kaduszkiewicz H, Nguyen TS, van den Bussche H, Scherer M, Schön G. Multimorbidity patterns and 5-year overall mortality: Results from a claims data-based observational study. *Journal of Comorbidity* 2018; **8**(1): 2235042X18816588.
  21. Maciejewski ML, Hammill BG. Measuring the burden of multimorbidity among Medicare beneficiaries via condition counts and cumulative duration. *Health services research* 2019; **54**(2): 484-91.

1  
2  
3  
4  
5  
6  
7  
8  
9  
10  
11  
12  
13  
14  
15  
16  
17  
18  
19  
20  
21  
22  
23  
24  
25  
26  
27  
28  
29  
30  
31  
32  
33  
34  
35  
36  
37  
38  
39  
40  
41  
42  
43  
44  
45  
46  
47  
48  
49  
50  
51  
52  
53  
54  
55  
56  
57  
58  
59  
60

22. Feng XL, Pang M, Beard J. Health system strengthening and hypertension awareness, treatment and control: data from the China Health and Retirement Longitudinal Study. *Bulletin of the World Health Organization* 2014; **92**(1): 29-41.

For peer review only

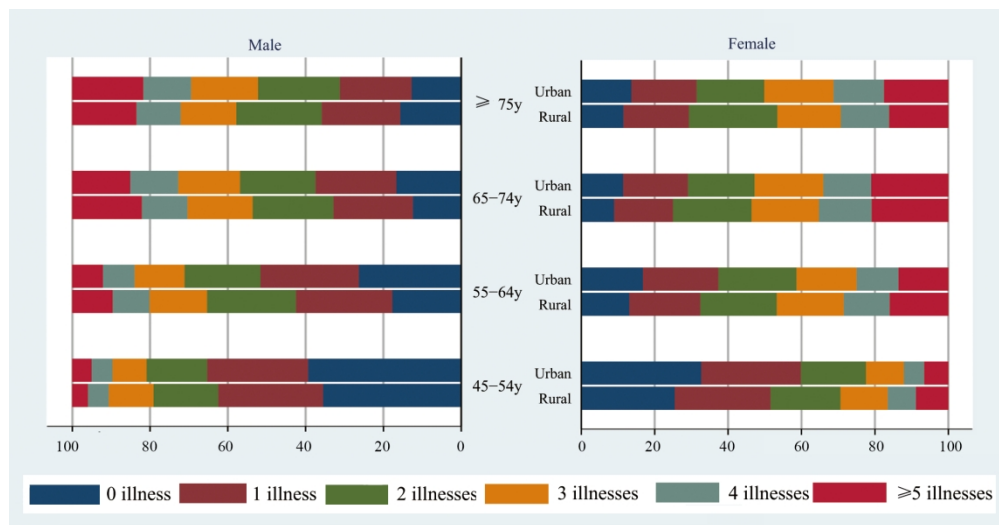

Figure 1. Weighted percentage of population subgroups by number of chronic illness, urbanity, sex and age

180x93mm (300 x 300 DPI)



1  
2  
3  
4  
5  
6  
7  
8  
9  
10  
11  
12  
13  
14  
15  
16  
17  
18  
19  
20  
21  
22  
23  
24  
25  
26  
27  
28  
29  
30  
31  
32  
33  
34  
35  
36  
37  
38  
39  
40  
41  
42  
43  
44  
45  
46

**Appendix Table 1. Weighted prevalence of multimorbidity by sex, urbanity and age group**

| Panel A. Male          | 45-54 years old |       | 55-64 years old |       | 65-74 years old |       | 75 years and above old |       |
|------------------------|-----------------|-------|-----------------|-------|-----------------|-------|------------------------|-------|
|                        | Urban           | Rural | Urban           | Rural | Urban           | Rural | Urban                  | Rural |
| No illness             | 42.6%           | 35.3% | 29.0%           | 17.8% | 17.5%           | 12.3% | 10.8%                  | 14.4% |
| Single illness         | 24.6%           | 26.7% | 25.4%           | 25.4% | 22.8%           | 20.2% | 16.4%                  | 21.1% |
| <b>Multimorbidity</b>  |                 |       |                 |       |                 |       |                        |       |
| Two illnesses          | 12.9%           | 17.1% | 17.6%           | 22.6% | 18.3%           | 20.8% | 19.9%                  | 21.7% |
| Three illnesses        | 11.4%           | 11.7% | 12.4%           | 15.0% | 14.6%           | 17.5% | 26.3%                  | 15.8% |
| Four illnesses         | 4.4%            | 5.2%  | 8.8%            | 8.9%  | 11.2%           | 11.3% | 10.2%                  | 11.2% |
| Five or more illnesses | 4.1%            | 3.9%  | 6.8%            | 10.3% | 15.6%           | 18.0% | 16.4%                  | 15.8% |
| Panel B. Female        | 45-54 years old |       | 55-64 years old |       | 65-74 years old |       | 75 years and above old |       |
|                        | Urban           | Rural | Urban           | Rural | Urban           | Rural | Urban                  | Rural |
| No illness             | 36.9%           | 25.2% | 17.3%           | 13.5% | 16.7%           | 8.8%  | 16.6%                  | 12.0% |
| Single illness         | 26.9%           | 27.0% | 23.0%           | 19.0% | 17.7%           | 15.9% | 15.1%                  | 18.4% |
| <b>Multimorbidity</b>  |                 |       |                 |       |                 |       |                        |       |
| Two illnesses          | 17.2%           | 19.4% | 20.5%           | 21.7% | 15.7%           | 21.3% | 23.0%                  | 23.4% |
| Three illnesses        | 8.9%            | 12.6% | 16.7%           | 18.4% | 17.1%           | 18.9% | 18.0%                  | 17.1% |
| Four illnesses         | 5.0%            | 7.6%  | 10.2%           | 12.2% | 11.4%           | 14.0% | 10.7%                  | 13.5% |
| Five or more illnesses | 5.1%            | 8.3%  | 12.3%           | 15.2% | 21.4%           | 21.1% | 16.6%                  | 15.7% |

Note: Individual weight with household and individual non-response adjustment was used to calculate the weighted prevalence.

**Appendix Table 2. Odds ratios (OR) for multimorbidity by age, sex, marital status, education, former smoking and alcohol consumption, health insurance status and urbanity**

|                               | Ordered Logistic Model |               |
|-------------------------------|------------------------|---------------|
|                               | Odds Ratio             | 95% CI        |
| Age (year)                    | Reference              |               |
| 45-54                         | Reference              |               |
| 55-64                         | 1.545                  | [1.439,1.659] |
| 65-74                         | 2.238                  | [2.064,2.426] |
| ≥75                           | 1.885                  | [1.690,2.103] |
| Sex                           | Reference              |               |
| Male                          | 1.672                  | [1.527,1.830] |
| Female                        |                        |               |
| Educational level             | Reference              |               |
| Illiterate                    | 1.177                  | [1.082,1.281] |
| Part of primary school        | 1.109                  | [1.019,1.206] |
| Primary school                | 0.964                  | [0.882,1.054] |
| Junior middle school          | 0.940                  | [0.844,1.047] |
| Senior middle school or above |                        |               |
| Marital status                | Reference              |               |
| Not in marriage               | 0.850                  | [0.782,0.924] |
| Married                       |                        |               |
| Smoking                       | Reference              |               |
| Current                       | 1.502                  | [1.379,1.636] |
| Former                        | 0.940                  | [0.859,1.029] |
| Never                         |                        |               |
| Alcohol consumption           | Reference              |               |
| Current                       | 1.828                  | [1.665,2.008] |
| Former                        | 1.102                  | [1.028,1.181] |
| Never                         |                        |               |
| Health insurance status       |                        |               |
| Covered                       | Reference              |               |
| Not covered                   | 0.854                  | [0.776,0.941] |
| Urbanity                      |                        |               |
| Urban                         | Reference              |               |
| Rural                         | 1.064                  | [1.003,1.128] |
| N                             |                        | 16905         |

Note: Ordered logistic model was applied for five categories outcome which refers to absence or single illness, two illnesses, three illnesses, four illnesses, five illnesses or more.

STROBE Statement—checklist of items that should be included in reports of observational studies

|                              | Item No. | Recommendation                                                                                                                                                                                                                                                                                                                                                                                                                                                         | Page No. | Relevant text from manuscript |
|------------------------------|----------|------------------------------------------------------------------------------------------------------------------------------------------------------------------------------------------------------------------------------------------------------------------------------------------------------------------------------------------------------------------------------------------------------------------------------------------------------------------------|----------|-------------------------------|
| <b>Title and abstract</b>    | 1        | (a) Indicate the study’s design with a commonly used term in the title or the abstract                                                                                                                                                                                                                                                                                                                                                                                 | 2        | Cross-sectional               |
|                              |          | (b) Provide in the abstract an informative and balanced summary of what was done and what was found                                                                                                                                                                                                                                                                                                                                                                    | 2        |                               |
| <b>Introduction</b>          |          |                                                                                                                                                                                                                                                                                                                                                                                                                                                                        |          |                               |
| Background/rationale         | 2        | Explain the scientific background and rationale for the investigation being reported                                                                                                                                                                                                                                                                                                                                                                                   | 4        |                               |
| Objectives                   | 3        | State specific objectives, including any prespecified hypotheses                                                                                                                                                                                                                                                                                                                                                                                                       | 4        |                               |
| <b>Methods</b>               |          |                                                                                                                                                                                                                                                                                                                                                                                                                                                                        |          |                               |
| Study design                 | 4        | Present key elements of study design early in the paper                                                                                                                                                                                                                                                                                                                                                                                                                | 4        |                               |
| Setting                      | 5        | Describe the setting, locations, and relevant dates, including periods of recruitment, exposure, follow-up, and data collection                                                                                                                                                                                                                                                                                                                                        | 4        |                               |
| Participants                 | 6        | (a) <i>Cohort study</i> —Give the eligibility criteria, and the sources and methods of selection of participants. Describe methods of follow-up<br><i>Case-control study</i> —Give the eligibility criteria, and the sources and methods of case ascertainment and control selection. Give the rationale for the choice of cases and controls<br><i>Cross-sectional study</i> —Give the eligibility criteria, and the sources and methods of selection of participants | 4        |                               |
|                              |          | (b) <i>Cohort study</i> —For matched studies, give matching criteria and number of exposed and unexposed<br><i>Case-control study</i> —For matched studies, give matching criteria and the number of controls per case                                                                                                                                                                                                                                                 |          |                               |
| Variables                    | 7        | Clearly define all outcomes, exposures, predictors, potential confounders, and effect modifiers. Give diagnostic criteria, if applicable                                                                                                                                                                                                                                                                                                                               | 4-5      |                               |
| Data sources/<br>measurement | 8*       | For each variable of interest, give sources of data and details of methods of assessment (measurement). Describe comparability of assessment methods if there is more than one group                                                                                                                                                                                                                                                                                   | 4-5      |                               |
| Bias                         | 9        | Describe any efforts to address potential sources of bias                                                                                                                                                                                                                                                                                                                                                                                                              | 5        |                               |
| Study size                   | 10       | Explain how the study size was arrived at                                                                                                                                                                                                                                                                                                                                                                                                                              | 4        |                               |

Continued on next page

1  
2  
3  
4  
5  
6  
7  
8  
9  
10  
11  
12  
13  
14  
15  
16  
17  
18  
19  
20  
21  
22  
23  
24  
25  
26  
27  
28  
29  
30  
31  
32  
33  
34  
35  
36  
37  
38  
39  
40  
41  
42  
43  
44  
45  
46

|                        |     |                                                                                                                                                                                                                                                                                                           |                |
|------------------------|-----|-----------------------------------------------------------------------------------------------------------------------------------------------------------------------------------------------------------------------------------------------------------------------------------------------------------|----------------|
| Quantitative variables | 11  | Explain how quantitative variables were handled in the analyses. If applicable, describe which groupings were chosen and why                                                                                                                                                                              | 5              |
| Statistical methods    | 12  | (a) Describe all statistical methods, including those used to control for confounding                                                                                                                                                                                                                     | 5              |
|                        |     | (b) Describe any methods used to examine subgroups and interactions                                                                                                                                                                                                                                       | Not applicable |
|                        |     | (c) Explain how missing data were addressed                                                                                                                                                                                                                                                               | 4              |
|                        |     | (d) <i>Cohort study</i> —If applicable, explain how loss to follow-up was addressed<br><i>Case-control study</i> —If applicable, explain how matching of cases and controls was addressed<br><i>Cross-sectional study</i> —If applicable, describe analytical methods taking account of sampling strategy | Not applicable |
|                        |     | (e) Describe any sensitivity analyses                                                                                                                                                                                                                                                                     | 5              |
| <b>Results</b>         |     |                                                                                                                                                                                                                                                                                                           |                |
| Participants           | 13* | (a) Report numbers of individuals at each stage of study—eg numbers potentially eligible, examined for eligibility, confirmed eligible, included in the study, completing follow-up, and analysed                                                                                                         | 5-6            |
|                        |     | (b) Give reasons for non-participation at each stage                                                                                                                                                                                                                                                      | 6              |
|                        |     | (c) Consider use of a flow diagram                                                                                                                                                                                                                                                                        |                |
| Descriptive data       | 14* | (a) Give characteristics of study participants (eg demographic, clinical, social) and information on exposures and potential confounders                                                                                                                                                                  |                |
|                        |     | (b) Indicate number of participants with missing data for each variable of interest                                                                                                                                                                                                                       |                |
|                        |     | (c) <i>Cohort study</i> —Summarise follow-up time (eg, average and total amount)                                                                                                                                                                                                                          |                |
| Outcome data           | 15* | <i>Cohort study</i> —Report numbers of outcome events or summary measures over time                                                                                                                                                                                                                       |                |
|                        |     | <i>Case-control study</i> —Report numbers in each exposure category, or summary measures of exposure                                                                                                                                                                                                      |                |
|                        |     | <i>Cross-sectional study</i> —Report numbers of outcome events or summary measures                                                                                                                                                                                                                        | 5-6            |
| Main results           | 16  | (a) Give unadjusted estimates and, if applicable, confounder-adjusted estimates and their precision (eg, 95% confidence interval). Make clear which confounders were adjusted for and why they were included                                                                                              | 6-7            |
|                        |     | (b) Report category boundaries when continuous variables were categorized                                                                                                                                                                                                                                 | 6-7            |
|                        |     | (c) If relevant, consider translating estimates of relative risk into absolute risk for a meaningful time period                                                                                                                                                                                          |                |

Continued on next page

|                          |    |                                                                                                                                                                            |      |                   |
|--------------------------|----|----------------------------------------------------------------------------------------------------------------------------------------------------------------------------|------|-------------------|
| Other analyses           | 17 | Report other analyses done—eg analyses of subgroups and interactions, and sensitivity analyses                                                                             | 5    |                   |
| <b>Discussion</b>        |    |                                                                                                                                                                            |      |                   |
| Key results              | 18 | Summarise key results with reference to study objectives                                                                                                                   | 9    |                   |
| Limitations              | 19 | Discuss limitations of the study, taking into account sources of potential bias or imprecision. Discuss both direction and magnitude of any potential bias                 | 9-10 |                   |
| Interpretation           | 20 | Give a cautious overall interpretation of results considering objectives, limitations, multiplicity of analyses, results from similar studies, and other relevant evidence | 9    |                   |
| Generalisability         | 21 | Discuss the generalisability (external validity) of the study results                                                                                                      | 9    |                   |
| <b>Other information</b> |    |                                                                                                                                                                            |      |                   |
| Funding                  | 22 | Give the source of funding and the role of the funders for the present study and, if applicable, for the original study on which the present article is based              | 10   | Funding Statement |

\*Give information separately for cases and controls in case-control studies and, if applicable, for exposed and unexposed groups in cohort and cross-sectional studies.

**Note:** An Explanation and Elaboration article discusses each checklist item and gives methodological background and published examples of transparent reporting. The STROBE checklist is best used in conjunction with this article (freely available on the Web sites of PLoS Medicine at <http://www.plosmedicine.org/>, Annals of Internal Medicine at <http://www.annals.org/>, and Epidemiology at <http://www.epidem.com/>). Information on the STROBE Initiative is available at [www.strobe-statement.org](http://www.strobe-statement.org).

# BMJ Open

**Rurality associated with a higher prevalence of multimorbidity in middle-aged and elderly Chinese: findings from the China Health and Retirement Longitudinal Study (2015-2016)**

|                                 |                                                                                                                                                                                                                                                                      |
|---------------------------------|----------------------------------------------------------------------------------------------------------------------------------------------------------------------------------------------------------------------------------------------------------------------|
| Journal:                        | <i>BMJ Open</i>                                                                                                                                                                                                                                                      |
| Manuscript ID                   | bmjopen-2020-038404.R1                                                                                                                                                                                                                                               |
| Article Type:                   | Original research                                                                                                                                                                                                                                                    |
| Date Submitted by the Author:   | 21-Jul-2020                                                                                                                                                                                                                                                          |
| Complete List of Authors:       | Ma, Xiaochen; Peking University, China Center for Health Development Studies<br>He, Yu; London School of Hygiene & Tropical Medicine, Department of Non-communicable Disease Epidemiology<br>Xu, Jin; Peking University, China Center for Health Development Studies |
| <b>Primary Subject Heading</b>: | Epidemiology                                                                                                                                                                                                                                                         |
| Secondary Subject Heading:      | Global health, Geriatric medicine                                                                                                                                                                                                                                    |
| Keywords:                       | EPIDEMIOLGY, GERIATRIC MEDICINE, PUBLIC HEALTH, Depression & mood disorders < PSYCHIATRY                                                                                                                                                                             |
|                                 |                                                                                                                                                                                                                                                                      |

SCHOLARONE™  
Manuscripts



I, the Submitting Author has the right to grant and does grant on behalf of all authors of the Work (as defined in the below author licence), an exclusive licence and/or a non-exclusive licence for contributions from authors who are: i) UK Crown employees; ii) where BMJ has agreed a CC-BY licence shall apply, and/or iii) in accordance with the terms applicable for US Federal Government officers or employees acting as part of their official duties; on a worldwide, perpetual, irrevocable, royalty-free basis to BMJ Publishing Group Ltd ("BMJ") its licensees and where the relevant Journal is co-owned by BMJ to the co-owners of the Journal, to publish the Work in this journal and any other BMJ products and to exploit all rights, as set out in our [licence](#).

The Submitting Author accepts and understands that any supply made under these terms is made by BMJ to the Submitting Author unless you are acting as an employee on behalf of your employer or a postgraduate student of an affiliated institution which is paying any applicable article publishing charge ("APC") for Open Access articles. Where the Submitting Author wishes to make the Work available on an Open Access basis (and intends to pay the relevant APC), the terms of reuse of such Open Access shall be governed by a Creative Commons licence – details of these licences and which [Creative Commons](#) licence will apply to this Work are set out in our licence referred to above.

Other than as permitted in any relevant BMJ Author's Self Archiving Policies, I confirm this Work has not been accepted for publication elsewhere, is not being considered for publication elsewhere and does not duplicate material already published. I confirm all authors consent to publication of this Work and authorise the granting of this licence.

1  
2  
3 1 **[Title page]**

4 2 **Title of the article: Rurality associated with a higher prevalence of multimorbidity**  
5 3 **in middle-aged and elderly Chinese: findings from the China Health and**  
6 4 **Retirement Longitudinal Study (2015-2016)**  
7  
8  
9

10 6  
11 7  
12 8 **The corresponding author:**

13 9 Full name: Jin Xu

14 10 Postal address: No. 38, Xueyuan Road, Haidian, Beijing, 100191, China

15 11 E-mail: xujin@hsc.pku.edu.cn

16 12 Telephone number: 0086-10-82805701  
17  
18  
19

20 14 **Full name, department, institution, city and country of all co-authors:**

21 15 First author: Xiaochen Ma

22 16 Department: China Center for Health Development Studies

23 17 Institution: Peking University

24 18 Country: China  
25  
26  
27

28 20 Second author: Yu He

29 21 Department: Department of Non-communicable Disease Epidemiology

30 22 Institution: London School of Hygiene & Tropical Medicine

31 23 Country: United Kingdom  
32  
33  
34

35 25 Third author: Jin Xu

36 26 Department: China Center for Health Development Studies

37 27 Institution: Peking University

38 28 Country: China  
39  
40

41 30 **Word count, excluding title page, abstract, references, figures and tables: 1841**

42 31  
43 32 **Keywords:** multimorbidity, prevalence, China, rural, elderly  
44  
45  
46  
47  
48  
49  
50  
51  
52  
53  
54  
55  
56  
57  
58  
59  
60



## 1 **Abstract**

### 2 **Background**

3 To address the neglect of depression in multimorbidity measurement and the lack of  
4 focus on rural population in previous literature about China, this paper aimed to  
5 estimate the prevalence of multimorbidity (including depressive disorders) among the  
6 country's rural and urban population.

### 8 **Methods**

9 We used a cross-sectional design and data from a nationally representative survey  
10 conducted in 2015–2016 among Chinese people aged 45 years or older involving  
11 19,656 participants. Multimorbidity was measured with a cut-off point of having two  
12 or more among 14 chronic illnesses. 13 of them were based on self-reported physician  
13 diagnosis. In addition, depressive disorders were assessed with the 10-item Center for  
14 Epidemiologic Studies Depression Scale (CES-D 10). The weighted prevalence of  
15 multimorbidity was calculated, with a non-response adjustment. Multivariate logistic  
16 regression was applied to analyze the relation between covariates and multimorbidity.

### 18 **Findings**

19 Multimorbidity was highly prevalent (54.3%) among the studied population. Contrary  
20 to previous studies, we found the prevalence of multimorbidity to be higher among the  
21 rural dwellers (58.3%) than among the urban population (50.4%). After adjustment for  
22 covariates, rural residents had 7.5% higher odds (95% CI of odds ratio: [1.003, 1.151])  
23 of having multimorbidity than their urban counterparts. Above 70% of chronic patients  
24 above 45 years old have multimorbidity, while 80.6%-97.9% of patients with any of  
25 the 14 chronic illnesses have multimorbidity.

### 27 **Interpretation**

28 Future health system development in China should transform from preventing and  
29 controlling non-communicable diseases as individual diseases to addressing people's  
30 comprehensive health needs under multimorbidity. The rural population should be  
31 prioritized as they suffered more from multimorbidity than the urban population.

1  
2  
3 **[Article summary]**

4 **Strengths and limitations of this study**

- 5 ● This is the first study showing that rurality is associated with higher prevalence of multimorbidity  
6 in middle-aged and elderly Chinese.  
7  
8 ● We used nationally representative sample of the people above the age of 45 in China.  
9  
10 ● In our measurement of multimorbidity, we have included depressive disorders, a highly prevalent  
11 and important mental health condition in China but ignored in previous studies.  
12  
13 ● We used self-reported measurement for 13 of the 14 chronic illnesses studied, which is likely to  
14 cause underreporting as previous studies using administrative data reported higher prevalence of  
15 multimorbidity.  
16  
17 ● The lower accessibility to health care for chronic illnesses for rural population than for urban  
18 population means that the study has probably still underestimated the prevalence of multimorbidity  
19 in the rural population.  
20  
21  
22  
23  
24  
25  
26  
27  
28  
29  
30  
31  
32  
33  
34  
35  
36  
37  
38  
39  
40  
41  
42  
43  
44  
45  
46  
47  
48  
49  
50  
51  
52  
53  
54  
55  
56  
57  
58  
59  
60

## [Main text]

### 1. Introduction

As global life expectancy rises, there is an increasing number of middle-aged and elderly with chronic disorders, both physical and mental. The co-occurrence of two or more chronic illnesses within a person is defined as multimorbidity.<sup>1</sup> Multimorbidity is a strong predictor of mortality.<sup>2</sup> It is also associated with reduced functional independence,<sup>3,4</sup> poor quality of life and well-being.<sup>5,6</sup> Multimorbidity also accounts for a disproportionately large share of health care utilizations and expenditures.<sup>7,8</sup> The implications go beyond extra spending. As most health systems were designed based on single diseases, issues such as poly-pharmacy pose enormous challenges for care coordination and patients' self-management.<sup>9</sup>

Although populations of low- and middle-income countries (LMICs) are generally younger than those in high-income countries, some major LMICs are ageing at particularly rapid paces. China is a case in point. While it took France almost 150 years for the proportion of people above 60 to increase from 10% to 20%,<sup>10</sup> the same proportion in China increased from 10.3% in 2000 to 17.6% in 2018 (those aged between 45 and 60 also increased from 15.4% to 23.6% during the same time).<sup>11</sup> The limited epidemiological evidence from LMICs gave a wide range of estimated prevalence of multimorbidity, e.g. from 9% to 83% in South Asia.<sup>12</sup> Given the likelihood of multimorbidity as population ages and its serious impact on health and well-being, accurate estimation of the prevalence of multimorbidity is important for LMICs like China.

Noteworthy, there is a higher percentage (20.5%) of old people (aged at or above 60) among the rural Chinese (accounting for 40.4% of all Chinese) than among their urban counterparts (16.1%),<sup>11</sup> likely due to emigration of younger rural adults to the urban area. As findings from a study done in South Africa suggests, multimorbidity may disproportionately affect the less well-off.<sup>13-15</sup> Despite improvement, quality care is less accessible in rural China compared to its urban areas<sup>16</sup>, as most rural primary care doctors still lack a full university degree.<sup>17</sup> Therefore, rural adults with chronic illnesses were at a higher risk of developing multimorbidity, meaning it is important particularly to study the rural situation.

We conducted a systematic literature search for published papers on prevalence of multimorbidity in China on 31 January 2020. We used search terms related to multimorbidity, prevalence and China on PubMed and Web of Science and did not apply language restrictions. Our search resulted in one systematic review that reported findings from local areas in China and five papers that covered nationwide prevalence. The systematic review (published in 2015) showed that most previous work about China focused on urban populations. Among the five papers, one was also restricted to urban population. The other four papers reported national prevalence of multimorbidity among middle-age and elderly Chinese.<sup>18-21</sup> These papers all used the same data set from the China Health and Retirement Longitudinal Study (CHARLS) and reported consistently higher prevalence of multimorbidity among urban population than rural population. Zhao et al. for example reported that rurality was associated with an odds ratio of 0.76 of multimorbidity in people above 50 years old.<sup>21</sup>

These studies have two important limitations. First, measurement of multimorbidity were all based on self-report. This is likely to cause underreporting which disproportionately affects rural population for whom health care is usually less accessible than urban population.<sup>22</sup> Second, these studies had neglected depression,<sup>19-21</sup> a most prevalent mental health condition among Chinese<sup>23</sup> and a condition widely used in previous international multimorbidity studies.<sup>24,25</sup> As Lei et al. reported, prevalence of depressive

1 symptoms in 2011/2012 was also found to be much higher among rural middle-aged and elderly (35%  
2 for men and 49% for women) than among urban ones (23% for men and 35% for women),<sup>26</sup> though other  
3 estimation put the range of between 6.3% to 53.6%. Given the higher prevalence of depression among  
4 females than males, neglecting depression is also problematic from a gender equity perspective.

5 Limited scholarly focus on rural multimorbidity, reliance on self-reported diagnosis and neglect of  
6 depression all mean potentially substantial underestimation of the prevalence of multimorbidity and its  
7 consequences for health and wellbeing, particularly among China's rural population. This knowledge  
8 gap profoundly hinders the development of equity- and needs-oriented health policies. Hence, it is  
9 important to include investigator-assessed health conditions and measurement of depression with a focus  
10 on urban-rural disparity in studies on multimorbidity in China. This paper aimed to provide an updated  
11 estimation of national prevalence of multimorbidity among middle-age and older adults in China with  
12 the inclusion of depression and through the lens of urban-rural comparison.

## 15 2. Methods

### 17 *Study design and participants*

18 The study used a cross-sectional design and data from the China Health and Retirement  
19 Longitudinal Study (CHARLS). The survey is nationally representative and longitudinal, covering adults  
20 aged 45 years or older. It includes assessments of social, economic and health circumstances of  
21 community residents. The detailed cohort profile was previously published. The participants of CHARLS  
22 closely resembled the Chinese national census population in terms of demographic characteristics.<sup>27</sup>

23 We used data from the latest wave of CHARLS collected in 2015-2016. All participants provided  
24 written informed consent, and survey protocols were approved by the Ethics Review Board at Peking  
25 University.<sup>27</sup> Of the 19,656 participants, a total of 2751 (14.0%) contained missing observations in  
26 variables. To address potential non-response bias, we weighed the samples using a survey weight variable  
27 provided by CHARLS, which gave sampled units (households and individuals) weights inversely  
28 proportional to their probability of having been selected and responded.<sup>28</sup>

### 30 *Measurement of multimorbidity*

31 In line with previous systematic review and studies done in China,<sup>7,24,25</sup> we used a disease count  
32 approach to measure multimorbidity. Following suggested cut-off point, a binary variable of coexistence  
33 of two or more chronic diseases/conditions within one individual constituted our main indication of  
34 multimorbidity. Partly due to the data restriction, the selection and definition of morbidities varies across  
35 previous multimorbidity studies, and no uniform operational measurement exists. We sought to include  
36 morbidities that were prevalent, which resulted in a list of 14 chronic illnesses.

37 Among these chronic illnesses, 13 (hypertension, diabetes, cancer, lung disease, heart problem,  
38 stroke, arthritis, dyslipidemia, liver disease, kidney disease, stomach disease, asthma and memory  
39 problem) were assessed based on self-reported diagnosis by a doctor. Participants were asked "have you  
40 been diagnosed with [conditions listed below, read by interviewers one by one] by a doctor?" Due to the  
41 recent decade of health system reform, most people in China are covered by basic social health insurance  
42 and the Essential Public Health Service Scheme that covered the screening and management (e.g. follow-  
43 up) of a range of prevalent non-communicable conditions (hypertension, diabetes, severe mental

1 disorders, breast cancer, etc.<sup>29</sup>). Regular checkup is now universally provided to all elderly above 65  
2 years old. Most also have a community-based primary health care facility in their neighborhood. Access  
3 to care is generally good, though quality differs. On average, every Chinese visit health facilities 5.6  
4 times per year in 2015.<sup>30</sup> However, continued urban-rural gaps in health service benefits and access meant  
5 that there would likely be underreporting of chronic conditions.<sup>22,31</sup> In addition, depressive disorders  
6 were assessed with 10-item Center for Epidemiologic Studies Depression Scale (CES-D 10). We  
7 consider the implications of using alongside self-reported physician diagnosis in the discussion section.  
8 In a sensitive analysis, an ordinal measure of multimorbidity (absence or single illness, two illnesses,  
9 three illnesses, four illnesses, five illnesses or more) was considered.

### 11 *Covariates*

12 This study used a range of demographic, socioeconomic, behavioral and health insurance covariates,  
13 including age group (45-54 years old, 55-64 years old, 65-74 years old, 75 years and above), sex (male  
14 or female), marital status (married, otherwise), educational attainment (illiterate, partial primary school,  
15 completed primary school, middle school, or high school or above), smoking (current, former or never),  
16 alcohol drinking (current, former or never), health insurance status (covered or not), and urbanity (urban  
17 vs. rural residence).

18 Urban or rural residence was measured based on the administrative classification of the participants'  
19 basic residing community. The basic rural resident community is a *cun* (literally meaning village), while  
20 a basic urban resident community is a *jiedao* (literally meaning street). Rural communities are usually  
21 far away from city or county centers, while urban ones are much closer. Equally important as physical  
22 distance was the fact that separated social policies applied for urban and rural communities in China. In  
23 recent years, entitlement differences between rural and urban areas regarding healthcare and social  
24 welfare are being reduced, though substantial pro-urban gaps remain.<sup>32</sup> In 2015, the average annual  
25 disposable income of urban residents was 31194.8 *yuan* (6.23 Chinese *yuan* = 1 US dollar in 2015), or  
26 2.73 times that of rural residents (11421.7 *yuan*).<sup>33</sup>

### 28 *Statistical analysis*

29 Frequencies (percentage) are reported to summarize the distribution of participants' characteristics.  
30 Weighted prevalence of individual chronic diseases and multimorbidity was calculated with adjustment  
31 using the survey weight. The distribution of multimorbidity by subpopulations was examined by  
32 stratified analysis of urbanity, sex and age groups. Multivariate logistic regression was applied to analyze  
33 the associations between covariates and the binary outcome of multimorbidity. A sensitivity analysis was  
34 conducted using ordered logit regressions to examine the relation between the same covariates and the  
35 ordinal outcome of multimorbidity.

## 37 **3. Results**

39 Table 1 presents the characteristics of the study population and their weighted prevalence of  
40 multimorbidity. Among the 19,656 participants, the mean age was 60.2 years, 51.3% were female, and  
41 59.8% were from rural areas. 54.3% of the weighted sample had multimorbidity. Among the remainder,  
42 about half (22.8% of the sample) had only one of the 14 conditions, while the other half (22.9%) had  
43 none. In other words, 70.4% of all chronic patients had multimorbidity. The prevalence of multimorbidity

1  
2  
3 1 generally increased as people aged.  
4  
5 2  
6  
7  
8  
9  
10  
11  
12  
13  
14  
15  
16  
17  
18  
19  
20  
21  
22  
23  
24  
25  
26  
27  
28  
29  
30  
31  
32  
33  
34  
35  
36  
37  
38  
39  
40  
41  
42  
43  
44  
45  
46  
47  
48  
49  
50  
51  
52  
53  
54  
55  
56  
57  
58  
59  
60

For peer review only

**1 Table 1. Characteristics of study population and weighted prevalence of multimorbidity**

|                               | N      | (% )    | Weighted Prevalence † |             |                        |
|-------------------------------|--------|---------|-----------------------|-------------|------------------------|
|                               |        |         | No illness            | One illness | Multi-morbidities (≥2) |
| Total                         | 19,656 | (100%)  | 22.9%                 | 22.8%       | 54.3%                  |
| Age (year)                    |        |         |                       |             |                        |
| 45-54                         | 6792   | (34.6%) | 35.0%                 | 26.3%       | 38.7%                  |
| 55-64                         | 6604   | (33.6%) | 19.3%                 | 23.2%       | 57.6%                  |
| 65-74                         | 4310   | (21.9%) | 13.7%                 | 19.1%       | 67.1%                  |
| ≥75                           | 1950   | (9.9%)  | 13.5%                 | 17.6%       | 68.9%                  |
| Sex                           |        |         |                       |             |                        |
| Male                          | 9573   | (48.7%) | 25.7%                 | 23.9%       | 50.4%                  |
| Female                        | 10083  | (51.3%) | 20.3%                 | 21.7%       | 58.0%                  |
| Educational level             |        |         |                       |             |                        |
| Illiterate                    | 4985   | (25.4%) | 15.8%                 | 22.5%       | 61.7%                  |
| Part of primary school        | 3252   | (16.6%) | 14.8%                 | 20.0%       | 65.2%                  |
| Primary school                | 5352   | (27.3%) | 32.7%                 | 22.8%       | 44.5%                  |
| Junior middle school          | 3804   | (19.4%) | 21.4%                 | 24.0%       | 54.5%                  |
| Senior middle school or above | 2237   | (11.4%) | 25.9%                 | 24.4%       | 49.7%                  |
| Unknown*                      | 26     | (0.1%)  |                       |             |                        |
| Marital status                |        |         |                       |             |                        |
| Not in marriage               | 2666   | (13.6%) | 15.6%                 | 17.8%       | 66.6%                  |
| Married                       | 16989  | (86.4%) | 24.2%                 | 23.6%       | 52.2%                  |
| Unknown*                      | 1      | (0.0%)  |                       |             |                        |
| Smoking                       |        |         |                       |             |                        |
| Current                       | 5568   | (28.4%) | 25.6%                 | 24.3%       | 50.1%                  |
| Former                        | 3112   | (15.9%) | 17.8%                 | 20.6%       | 61.5%                  |
| Never                         | 10929  | (55.7%) | 22.8%                 | 22.7%       | 54.5%                  |
| Unknown*                      | 47     | (0.2%)  |                       |             |                        |
| Alcohol consumption           |        |         |                       |             |                        |
| Current                       | 6947   | (35.5%) | 27.7%                 | 24.8%       | 47.6%                  |
| Former                        | 2213   | (11.3%) | 13.8%                 | 19.5%       | 66.7%                  |
| Never                         | 10427  | (53.2%) | 21.3%                 | 22.1%       | 56.6%                  |
| Unknown*                      | 69     | (0.4%)  |                       |             |                        |
| Health insurance status       |        |         |                       |             |                        |
| Covered                       | 15406  | (90.9%) | 16.2%                 | 22.0%       | 61.7%                  |
| Not covered                   | 1549   | (9.1%)  | 20.3%                 | 21.9%       | 57.7%                  |
| Unknown*                      | 2701   | (13.7%) |                       |             |                        |
| Urbanity                      |        |         |                       |             |                        |
| Urban                         | 7908   | (40.2%) | 26.7%                 | 23.0%       | 50.4%                  |
| Rural                         | 11748  | (59.8%) | 19.2%                 | 22.6%       | 58.3%                  |

Note: † Individual weight with household and individual non-response adjustment was used to calculate the weighted

1  
2  
3 prevalence. \* “Unknown” means that no response from the interviewed participants was recorded for the question.  
4  
5

6  
7  
8  
9  
10  
11  
12  
13  
14  
15  
16  
17  
18  
19  
20  
21  
22  
23  
24  
25  
26  
27  
28  
29  
30  
31  
32  
33  
34  
35  
36  
37  
38  
39  
40  
41  
42  
43  
44  
45  
46  
47  
48  
49  
50  
51  
52  
53  
54  
55  
56  
57  
58  
59  
60

1  
2 Figure 1 shows the weighted proportion of population subgroups by number of chronic illnesses,  
3 urbanity, sex and age. Except for male above 75 years old, prevalence of multimorbidity was consistently  
4 higher among rural population in all age groups in both sexes. Women, no matter urban or rural, were  
5 more likely to suffer from multimorbidity in all age groups. People in general were more likely to have  
6 more chronic illnesses as they aged. The trends became inconsistent when people became older than 75  
7 years. Detailed prevalence is provided in Appendix Table 1.  
8

9 [Please insert the image of Figure 1 here.]

10 **Figure 1. Weighted percentage of population subgroups by number of chronic illness, urbanity,**  
11 **sex and age**

12  
13 Table 2 presents the factors associated with multimorbidity. In the multivariate logistic model, older  
14 age, being female, not in marriage, without education level of middle school or above, former smoking  
15 and alcohol drinking, health insurance coverage, and rural residence were significantly associated with  
16 higher odds of having multimorbidity. After adjusting for age, sex, education, marital status, smoking,  
17 alcohol consumption, and insurance coverage, rural residents had 7.5% higher odds (95% CI of odds  
18 ratio: [1.003,1.151]) of having multimorbidity than urban residents. In the sensitivity analysis,  
19 multivariate ordered logistic model using an ordinal measure of multimorbidity yields a similar pattern  
20 that rural residents had 6.4% higher likelihood (95% CI of odds ratio: [1.003,1.128]) of having  
21 multimorbidity compared with urban residents, adjusted for the same covariates (Appendix Table 2).  
22



**Table 2. Odds ratios (OR) for multimorbidity by age, sex, marital status, education, former smoking and alcohol consumption, health insurance status and urbanity**

|                               | Logistic Model |               |
|-------------------------------|----------------|---------------|
|                               | Odds Ratio     | 95% CI        |
| Age (year)                    |                |               |
| 45-54                         | Reference      |               |
| 55-64                         | 1.546          | [1.428,1.674] |
| 65-74                         | 2.177          | [1.982,2.392] |
| ≥75                           | 1.908          | [1.676,2.173] |
| Sex                           |                |               |
| Male                          | Reference      |               |
| Female                        | 1.649          | [1.484,1.832] |
| Educational level             |                |               |
| Illiterate                    | Reference      |               |
| Part of primary school        | 1.150          | [1.039,1.274] |
| Primary school                | 1.077          | [0.974,1.190] |
| Junior middle school          | 0.932          | [0.840,1.034] |
| Senior middle school or above | 0.838          | [0.742,0.947] |
| Marital status                |                |               |
| Not in marriage               | Reference      |               |
| Married                       | 0.843          | [0.761,0.934] |
| Smoking                       |                |               |
| Current                       | Reference      |               |
| Former                        | 1.478          | [1.336,1.634] |
| Never                         | 0.956          | [0.862,1.061] |
| Alcohol consumption           |                |               |
| Current                       | Reference      |               |
| Former                        | 1.769          | [1.575,1.987] |
| Never                         | 1.061          | [0.980,1.150] |
| Insurance coverage            |                |               |
| Covered                       | Reference      |               |
| Not covered                   | 0.816          | [0.730,0.912] |
| Urbanity                      |                |               |
| Urban                         | Reference      |               |
| Rural                         | 1.075          | [1.003,1.151] |
| N                             | 16905          |               |

Note: Logistic model was applied for binary outcome which refers to 1 as coexistence of two or more chronic diseases and/or conditions within one person.

Table 3 reports the proportion of people with a given condition amongst the 14 chronic diseases, and the prevalence of multimorbidity among patients with at the given conditions. As much as 42.8% of Chinese at or above 45 years old had arthritis, which was the most prevalent condition. This was followed

1 by hypertension (34.6%), depressive disorders (31.1%) and stomach disease (31%). Compared to urban  
 2 residents, rural population were much more likely to be affected by arthritis (rural vs urban = 48.3% vs  
 3 36.5%), depressive disorders (36.8% vs 24.7%), while urban population were more likely to have  
 4 dyslipidemia (26.1% vs 14.3%).

5 Chronic patients from both urban and rural areas were predominantly having multimorbidity (83.6%-  
 6 97.6% overall, 80.6%-97.6% in urban population, and 84.5%-97.9% in rural population). Only among  
 7 kidney disease patients were urban conditional prevalence of multimorbidity higher than rural  
 8 conditional prevalence of multimorbidity. For any of the remaining 13 types, rural chronic patients were  
 9 more likely to have multimorbidity than urban ones. The maximal difference between rural and urban  
 10 conditional prevalence of multimorbidity among chronic patients of any of the 14 types is 4.4 percentage  
 11 point, observed in dyslipidemia.

12  
 13 **Table 3. Prevalence of chronic diseases and conditional prevalence of multimorbidity among**  
 14 **patients with at least one of 14 chronic diseases (aged at or above 45 years old)**

| Chronic diseases     | Proportion of patients with at a given condition |       |       | Prevalence of multimorbidity among patients with the given condition |       |       |
|----------------------|--------------------------------------------------|-------|-------|----------------------------------------------------------------------|-------|-------|
|                      | Total                                            | Urban | Rural | Total                                                                | Urban | Rural |
| Arthritis            | 42.8%                                            | 36.5% | 48.3% | 86.7%                                                                | 86.6% | 86.7% |
| Hypertension         | 34.6%                                            | 37.1% | 32.3% | 86.9%                                                                | 85.7% | 88.1% |
| Depressive disorders | 31.1%                                            | 24.7% | 36.8% | 83.0%                                                                | 80.6% | 84.5% |
| Stomach disease      | 31.0%                                            | 27.3% | 34.2% | 87.3%                                                                | 84.8% | 89.1% |
| Dyslipidemia         | 19.8%                                            | 26.1% | 14.3% | 91.4%                                                                | 89.8% | 94.2% |
| Heart problem        | 18.8%                                            | 21.8% | 16.0% | 94.4%                                                                | 93.3% | 95.8% |
| Lung disease         | 15.0%                                            | 13.7% | 16.1% | 92.8%                                                                | 92.4% | 93.1% |
| Diabetes             | 10.9%                                            | 13.9% | 8.3%  | 94.0%                                                                | 93.1% | 95.4% |
| Kidney disease       | 10.2%                                            | 10.3% | 10.1% | 94.4%                                                                | 95.2% | 93.7% |
| Liver disease        | 7.4%                                             | 8.5%  | 6.4%  | 91.8%                                                                | 90.2% | 93.6% |
| Asthma               | 6.0%                                             | 5.3%  | 6.7%  | 97.6%                                                                | 97.6% | 97.7% |
| Stroke               | 3.8%                                             | 4.3%  | 3.4%  | 96.6%                                                                | 95.4% | 97.9% |
| Memory problem       | 2.8%                                             | 2.8%  | 2.9%  | 94.6%                                                                | 94.1% | 95.1% |
| Cancer               | 1.9%                                             | 2.0%  | 1.7%  | 87.2%                                                                | 85.2% | 89.4% |

Note: Individual weight with household and individual non-response adjustment was used to calculate prevalence.

#### 15 16 17 **4. Discussion**

18 Our study using nationally representative data revealed a high prevalence (54.3%) of  
 19 multimorbidity among middle-aged or elderly adults in China. Extrapolating this figure to the entire  
 20 national population of adults aged 45 or above, we estimate that there are over 240 million middle-aged  
 21 or elderly Chinese with multimorbidity.<sup>34</sup> Our estimation of multimorbidity prevalence among people  
 22 aged at or above 45 in China is higher than previous estimations (42.4%) using a similar dataset.<sup>19</sup>

23 The main reason for the difference seems to be our inclusion of depression. As 24.7% of urban  
 24 residents and 36.8% of rural residents above the age of 45 had depressive symptoms, depression is indeed

1 a highly prevalent condition that merits inclusion in disease counts for multimorbidity. The level of  
2 prevalence is consistent with previous studies using a similar dataset.<sup>26</sup> Of note, the numbers are  
3 substantially lower compared to a nation-wide study on mental health using the World Mental Health  
4 Composite International Diagnostic Interview developed by the World Health Organization, which  
5 reported a 12-month prevalence of 3.6% among all Chinese in 2013.<sup>23</sup> However, the Composite  
6 International Diagnostic Interview was found to have high specificity and low sensitivity, thus the tool  
7 likely leads to substantial underestimation of the prevalence of depression.<sup>35</sup>

8 We also found that women were more likely to be multimorbid, consistent with a previous study in  
9 China.<sup>19</sup> It is likely due to the fact that women are better at expressing their conditions<sup>36</sup> and take better  
10 care of their health by checking out their illnesses with doctors.<sup>37</sup> In addition, multimorbidity is associated  
11 with a range of social and behavioral factors, such as lower education status, former smoking and alcohol  
12 consumption, being unmarried or divorced and lacking health insurance coverage.

13 Most chronic patients (70.4%) were likely to be multimorbid. People with a given condition out of  
14 our index chronic illnesses were very likely to be multimorbid (83.6%-97.6%). In other words, chronic  
15 illnesses rarely existed in a person as a single morbidity. A previous study using claims data found that  
16 82% of all elderly patients (aged at or above 60) covered by Urban Employees Basic Medical Insurance  
17 in Beijing had multimorbidity.<sup>38</sup>

18 Given that conditional prevalence of multimorbidity is very high (i.e. above 83%) among patients  
19 with a given condition from the 14 chronic diseases, the most prevalent ones (i.e. arthritis, hypertension,  
20 depressive disorders, stomach disease, with a prevalence higher than 30%) seem to have substantially  
21 contributed to the high prevalence of multimorbidity. The list of prevalent conditions (arthritis,  
22 hypertension, depressive disorders, stomach disease, dyslipidemia, heart problem, lung disease, diabetes,  
23 and kidney disease, all with a prevalence above 10%) is very similar with the findings of a systematic  
24 review from South Asia,<sup>12</sup> except that the studies included in that systematic review had not counted in  
25 depressive disorders, stomach disease and dyslipidemia, which were prevalent in China, and that skin  
26 diseases, prevalent in South Asia, were left out in the survey we used.

27 Physical chronic diseases have also been found associated with an increased risk of depressive  
28 symptoms. A previous study using CHARLS data also reported that patients with one, two, and three or  
29 more chronic physical conditions were 21%, 66%, and 111% more likely than those without any chronic  
30 physical condition to be affected by depressive symptoms.<sup>39</sup> The relation seems to work both ways.  
31 Patients with baseline hypertension were more likely to have depressive symptoms than those without  
32 hypertension in follow-up surveys, particularly in rural areas.<sup>40</sup> Meanwhile, major depression in the  
33 previous year was also found to be associated with an increased risk of ischemic heart disease in Chinese  
34 adults, independent of other major cardiovascular risk factors. In terms of access to care, despite reforms  
35 aiming at primary care strengthening and development in programs to address non-communicable  
36 diseases, there is still much challenge in the quality of primary care that hinders control of prevalent  
37 chronic physical conditions like hypertension and diabetes in China.<sup>31,41</sup> Furthermore, mental health  
38 service is yet to be well integrated into China's general health system.<sup>42</sup> These health system constraints  
39 probably contributed to the coexistence of high prevalence of chronic physical conditions and depression.

40 We found the prevalence of multimorbidity to be higher among the rural dwellers (58.3%) than  
41 among the urban population (50.4%) in 2015. This revised the previously consistent finding that urban  
42 residents were more likely to have multimorbidity than rural population.<sup>18,19,21</sup> The higher prevalence of  
43 multimorbidity among rural residents than among urban residents was shown in almost all age groups in

1 both sexes in our study. The rural-urban difference seems to be driven by the high rural prevalence of  
2 arthritis, depressive disorders, stomach disease and lung disease. We have further shown that  
3 multimorbidity was more prevalent among rural patients with at least one of 13 of the 14 chronic illnesses  
4 studied than among their urban counterparts. Again, our inclusion of depression seems to be a main  
5 reason that we have found higher prevalence of multimorbidity among rural population than among urban  
6 population. Compared to urban population, rural population's lower socio-economic status, poorer  
7 childhood health, poorer social services, and poorer access to quality health services (including  
8 diagnostic testing), as well as the very nature of rural residence and lifestyle, might all have contributed  
9 to their substantially higher prevalence of depression.<sup>26,31,39</sup>

10 Our findings have some important implications. First, given the prevalence of the multimorbidity  
11 epidemic and its dominance among chronic patients, it is imperative that China move from its current  
12 hospital-centric model with fragmented care across specialties and facilities towards an approach of  
13 people-centered integrated care built on strong primary care. Second, since rural population have higher  
14 prevalence of multimorbidity, priority for health system transformation (and related research) to address  
15 multimorbidity lies in the rural areas, where the needs are the greatest and service providers are less  
16 qualified and located more sparsely. Third, within the shorter life expectancy among rural population,<sup>43</sup>  
17 they also seem more severely affected by multimorbidity. The impact of multimorbidity on rural people's  
18 lives therefore deserves greater attention. Fourth, one out of four Chinese aged 45 or above were affected  
19 by depression and at least one chronic physical disorder. This combination came with potentially severe  
20 consequences on their wellbeing.<sup>6</sup> It is particularly important that mental health be integrated at an  
21 affordable cost to primary care.

22 Considering the importance of primary care in addressing multiple diseases in a coordinated and  
23 continuous manner, it seems critical to strengthen primary care so that equally good-quality integrated  
24 services can be provided to both rural and urban Chinese. Meanwhile, improving physical capacity and  
25 human resources at primary care facilities may be a long-term process. Digital health solutions such as  
26 telemedicine may be potentially valuable in facilitating support for front-liner providers (by facilitating  
27 better communication and information sharing), patients and their care-givers (by providing self-  
28 management tools)<sup>44</sup> both in the short term and in the long run. Meanwhile, issues like cost and  
29 mobilization of health professionals need to be addressed, for digital health interventions to work at all.  
30 As the Chinese government continuously pushed forward the agenda of digital health, how digital health  
31 interventions can better address the pro-urban gaps in multimorbidity deserves greater attention. Public  
32 finance is needed to allow resources online to flow towards the remote rural areas.

33 The present study has two strengths. First, we used nationally representative sample of the people  
34 above the age of 45 in China. Second, we have included depression in our measurement of  
35 multimorbidity following the practice suggested in two systematic reviews.<sup>24,25</sup>

36 There are also limitations of the study. First, we used self-reported diagnosis by physicians for 13  
37 of the 14 chronic illnesses studied. Despite China's recent health system development which extended  
38 essential health care coverage to all its population, health care for chronic illnesses is still less accessible  
39 for rural population.<sup>31</sup> Underdiagnosis of chronic illnesses (for example, diabetes) is likely to be higher  
40 in rural areas than in urban areas.<sup>22</sup> Hence, the actual urban-rural multimorbidity difference might be  
41 even larger than the current estimate.

42 Second, depression was measured by a scale (i.e. CES-D 10), unlike the other 13 conditions. The  
43 main reason is that depression was only available through CES-D 10. As the capacity of mental health

1  
2  
3 1 service is weak in China, particularly at the primary care level,<sup>42</sup> depression is likely underdiagnosed in  
4 2 China overall and particularly among rural population. A study has reported that a substantial proportion  
5 3 of rural Chinese women would attribute depressive disorders to social causes and not likely visit a doctor  
6 4 when having depressive disorders.<sup>45</sup> The CES-D 10 scale was validated as a screening instrument for  
7 5 depression <sup>46</sup> and appeared more suitable for our measurement of depression within the constraints of  
8 6 available data. Meanwhile, some had claimed that the scale has high sensitivity (low false negative) but  
9 7 low specificity (high false positive).<sup>47</sup> Hence, we might have over-estimated prevalence of depressive  
10 8 symptoms and its impact on overall prevalence of multimorbidity, though the effects are not likely to  
11 9 differ substantially across urban and rural areas.  
12  
13  
14  
15  
16  
17  
18

## 12 5. Conclusion

13 Our study estimated that over half of Chinese aged 45 years or above have two or more chronic  
14 14 medical conditions. Contrary to previous studies, we have provided clear evidence that multimorbidity  
15 15 is more prevalent among rural population (58.3%) than among their urban counterparts (50.4%). Above  
16 16 70% of chronic patients aged 45 years or above have multimorbidity. The prevalence of multimorbidity  
17 17 among patients with one of the 14 chronic illnesses included in this study was even higher and ranged  
18 18 between 80.6% and 97.9%. A critical driver of the rural-urban disparity in multimorbidity is the high  
19 19 prevalence of depression in rural areas. Future health system development in China should transform  
20 20 from preventing and controlling non-communicable diseases as individual diseases to addressing  
21 21 people's comprehensive health need under multimorbidity. The priority for such transformation is the  
22 22 rural areas.  
23

## 24 Contributorship statement

25 Jin Xu and Yu He did the literature review. Jin Xu and Xiaochen Ma did the study design. All  
26 26 authors participated in data analysis. Jin Xu, Yu He and Xiaochen Ma jointly wrote the first draft,  
27 27 participated in the revision of the draft and versions of the manuscript. All authors provided comments  
28 28 and confirmed the finalized version.  
29

## 30 Ethics statement

31 We used data from the China Health and Retirement Longitudinal Study. The survey and protocols  
32 32 were approved by the Peking University Ethics Review Board.  
33

## 34 Funding statement

35 The study is funded by Natural Science Foundation of China (No. 71804004). The funder of the  
36 36 study had no role in study design, data collection, data analysis, data interpretation, or writing of the  
37 37 report.  
38

## 39 Data sharing statement

40 All the data in the study are publicly available via the official website of the China Health and  
41 41 Retirement Longitudinal Study (<http://charls.pku.edu.cn/>).  
42

## 43 Patient and Public Involvement statement

1 Patients and the public were not directly involved in the development of the research question or  
2 outcome measures of the study, nor were they involved in study design and execution. There are no plans  
3 to disseminate the research to study participants.

#### 4 5 **References**

- 6 1. World Health Organization. World report on ageing and health. Geneva, Switzerland:  
7 World Health Organization, 2015.
- 8 2. Dugravot A, Fayosse A, Dumurgier J, et al. Social inequalities in multimorbidity, frailty,  
9 disability, and transitions to mortality: a 24-year follow-up of the Whitehall II cohort study. *Lancet*  
10 *Public Health* 2019; S2468-667(19)30226-9.
- 11 3. Marventano S, Ayala A, Gonzalez N, et al. Multimorbidity and functional status in  
12 community-dwelling older adults. *European journal of internal medicine* 2014; **25**(7): 610-6.
- 13 4. Wang X-X, Lin W-Q, Chen X-J, et al. Multimorbidity associated with functional  
14 independence among community-dwelling older people: a cross-sectional study in Southern  
15 China. *Health and Quality of Life Outcomes* 2017; **15**(1): 73.
- 16 5. Gu J, Chao J, Chen W, et al. Multimorbidity and health-related quality of life among the  
17 community-dwelling elderly: A longitudinal study. *Archives of gerontology and geriatrics* 2018;  
18 **74**: 133-40.
- 19 6. Coventry PA, Dickens C, Todd C. How does mental-physical multimorbidity express itself  
20 in lived time and space? A phenomenological analysis of encounters with depression and  
21 chronic physical illness. *Social science & medicine* 2014; **118**: 108-18.
- 22 7. Chen H, Cheng M, Zhuang Y, Broad JB. Multimorbidity among middle-aged and older  
23 persons in urban China: Prevalence, characteristics and health service utilization. *Geriatr*  
24 *Gerontol Int* 2018; **18**(10): 1447-52.

- 1  
2  
3  
4 1 8. Hopman P, Heins MJ, Korevaar JC, Rijken M, Schellevis FG. Health care utilization of  
5  
6 2 patients with multiple chronic diseases in the Netherlands: Differences and underlying factors.  
7  
8  
9 3 *European journal of internal medicine* 2016; **35**: 44-50.  
10  
11  
12 4 9. Pearson-Stuttard J, Ezzati M, Gregg EW. Multimorbidity—a defining challenge for health  
13  
14 5 systems. *The Lancet Public Health* 2019; **4**(12): e599-e600.  
15  
16  
17 6 10. World Health Organization. 10 Facts on Ageing And The Life Course. 2020.  
18  
19 7 [https://www.who.int/features/factfiles/ageing/ageing\\_facts/en/](https://www.who.int/features/factfiles/ageing/ageing_facts/en/) (accessed 1 July 2020).  
20  
21  
22 8 11. Academy of Medical Sciences. Multimorbidity: a priority for global health research, 2018.  
23  
24  
25 9 12. Pati S, Swain S, Hussain MA, et al. Prevalence and outcomes of multimorbidity in South  
26  
27 10 Asia: a systematic review. *BMJ Open* 2015; **5**(10): e007235.  
28  
29  
30 11 13. Ataguba JE-O. Inequalities in multimorbidity in South Africa. *International Journal for*  
31  
32 12 *Equity in Health* 2013; **12**(1): 64.  
33  
34  
35 13 14. Khanam MA, Streatfield PK, Kabir ZN, Qiu C, Cornelius C, Wahlin Å. Prevalence and  
36  
37 14 patterns of multimorbidity among elderly people in rural Bangladesh: a cross-sectional study.  
38  
39 15 *Journal of health, population, and nutrition* 2011; **29**(4): 406-14.  
40  
41  
42  
43 16 15. Boutayeb A, Boutayeb S, Boutayeb W. Multi-morbidity of non communicable diseases and  
44  
45 17 equity in WHO Eastern Mediterranean countries. *International Journal for Equity in Health* 2013;  
46  
47 18 **12**(1): 60.  
48  
49  
50  
51 19 16. Li J, Shi L, Liang H, Ding G, Xu L. Urban-rural disparities in health care utilization among  
52  
53 20 Chinese adults from 1993 to 2011. *BMC health services research* 2018; **18**(1): 102.  
54  
55  
56 21 17. Xu J, Mills A. Challenges for gatekeeping: a qualitative systems analysis of a pilot in rural  
57  
58  
59  
60

- 1  
2  
3  
4 1 China. *Int J Equity Health* 2017; **16**(1): 106.
- 5  
6 2 18. Yi JY, Kim H, Chi I. Urban-rural differences in multimorbidity and associated factors in  
7  
8  
9 3 China and Korea: A population-based survey study. *Geriatr Gerontol Int* 2019; **19**(11): 1157-  
10  
11 4 64.
- 12  
13  
14 5 19. Yao SS, Cao GY, Han L, et al. Prevalence and patterns of multimorbidity in a nationally  
15  
16  
17 6 representative sample of older Chinese: results from CHARLS. *J Gerontol A Biol Sci Med Sci*  
18  
19 7 2019.
- 20  
21  
22 8 20. Zhang R, Lu Y, Shi L, Zhang S, Chang F. Prevalence and patterns of multimorbidity among  
23  
24  
25 9 the elderly in China: a cross-sectional study using national survey data. *BMJ open* 2019; **9**(8):  
26  
27 10 e024268-e.
- 28  
29  
30 11 21. Zhao Y, Atun R, Oldenburg B, et al. Physical multimorbidity, health service use, and  
31  
32  
33 12 catastrophic health expenditure by socioeconomic groups in China: an analysis of population-  
34  
35 13 based panel data. *The Lancet Global health* 2020; **8**(6): e840-e9.
- 36  
37  
38 14 22. Yuan X, Liu T, Wu L, Zou ZY, Li C. Validity of self-reported diabetes among middle-aged  
39  
40  
41 15 and older Chinese adults: the China Health and Retirement Longitudinal Study. *BMJ Open*  
42  
43 16 2015; **5**(4): e006633.
- 44  
45  
46 17 23. Huang Y, Wang Y, Wang H, et al. Prevalence of mental disorders in China: a cross-  
47  
48  
49 18 sectional epidemiological study. *Lancet Psychiatry* 2019; **6**(3): 211-24.
- 50  
51  
52 19 24. Prados-Torres A, Calderón-Larrañaga A, Hanco-Saavedra J, Poblador-Plou B, van den  
53  
54 20 Akker M. Multimorbidity patterns: a systematic review. *Journal of Clinical Epidemiology* 2014;  
55  
56 21 **67**(3): 254-66.
- 57  
58  
59  
60



- 1  
2  
3  
4 1 25. Johnston MC, Crilly M, Black C, Prescott GJ, Mercer SW. Defining and measuring  
5  
6 2 multimorbidity: a systematic review of systematic reviews. *European journal of public health*  
7  
8  
9 3 2019; **29**(1): 182-9.  
10  
11 4 26. Lei X, Sun X, Strauss J, Zhang P, Zhao Y. Depressive symptoms and SES among the  
12  
13 5 mid-aged and elderly in China: evidence from the China Health and Retirement Longitudinal  
14  
15 6 Study national baseline. *Social science & medicine (1982)* 2014; **120**: 224-32.  
16  
17  
18 7 27. Zhao Y, Hu Y, Smith JP, Strauss J, Yang G. Cohort profile: the China Health and  
19  
20 8 Retirement Longitudinal Study (CHARLS). *International journal of epidemiology* 2014; **43**(1):  
21  
22 9 61-8.  
23  
24  
25 10 28. Zhao Y, Strauss J, Yang G, et al. China Health And Retirement Longitudinal Study – 2011-  
26  
27 11 2012 National Baseline Users'Guide, 2013.  
28  
29  
30 12 29. Yuan B, Balabanova D, Gao J, Tang S, Guo Y. Strengthening public health services to  
31  
32 13 achieve universal health coverage in China. *Bmj* 2019; **365**: l2358.  
33  
34  
35 14 30. National Health and Family Planning Commission. China Health and Family Planning  
36  
37 15 Statistical Yearbook 2016. Beijing; 2016.  
38  
39  
40 16 31. Feng XL, Pang M, Beard J. Health system strengthening and hypertension awareness,  
41  
42 17 treatment and control: data from the China Health and Retirement Longitudinal Study. *Bulletin*  
43  
44 18 *of the World Health Organization* 2014; **92**(1): 29-41.  
45  
46  
47 19 32. Meng Q, Fang H, Liu X, Yuan B, Xu J. Consolidating the social health insurance schemes  
48  
49 20 in China: towards an equitable and efficient health system. *The Lancet* 2015; **386**(10002): 1484-  
50  
51 21 92.  
52  
53  
54  
55  
56  
57  
58  
59  
60

- 1  
2  
3  
4 1 33. National Bureau of Statistics of China. China Statistical Yearbook 2019. Beijing, 2019.  
5  
6  
7 2 34. National Bureau of Statistics of China. China Statistical Yearbook 2016. Beijing, 2016.  
8  
9 3 35. Gelaye B, Williams MA, Lemma S, et al. Diagnostic validity of the composite international  
10  
11 4 diagnostic interview (CIDI) depression module in an East African population. *International*  
12  
13 5 *journal of psychiatry in medicine* 2013; **46**(4): 387-405.  
14  
15  
16 6 36. Masoomeh, Alimohammadian, Azam, et al. Multimorbidity as an important issue among  
17  
18 7 women: results of a gender difference investigation in a large population-based cross-sectional  
19  
20 8 study in West Asia. 2017.  
21  
22  
23 9 37. Jankovic J, Mirkovic M, Jovic-Vranes A, Santric-Milicevic M, Terzic-Supic ZJPH.  
24  
25 10 Association between non-communicable disease multimorbidity and health care utilization in a  
26  
27 11 middle-income country: population-based study. 2018; **155**: 35-42.  
28  
29  
30 12 38. Chen H, Chen Y, Cui B. The association of multimorbidity with healthcare expenditure  
31  
32 13 among the elderly patients in Beijing, China. *Arch Gerontol Geriatr* 2018; **79**: 32-8.  
33  
34  
35 14 39. Yao S-S, Cao G-Y, Han L, et al. Associations Between Somatic Multimorbidity Patterns  
36  
37 15 and Depression in a Longitudinal Cohort of Middle-Aged and Older Chinese. *Journal of the*  
38  
39 16 *American Medical Directors Association* 2020: S1525-8610(19)30837-0.  
40  
41  
42 17 40. Jin Y, Luo Y, He P. Hypertension, socioeconomic status and depressive symptoms in  
43  
44 18 Chinese middle-aged and older adults: Findings from the China health and retirement  
45  
46 19 longitudinal study. *Journal of Affective Disorders* 2019; **252**: 237-44.  
47  
48  
49 20 41. Li X, Krumholz HM, Yip W, et al. Quality of primary health care in China: challenges and  
50  
51 21 recommendations. *Lancet* 2020; **395**(10239): 1802-12.  
52  
53  
54  
55  
56  
57  
58  
59  
60

- 1  
2  
3  
4 1 42. Liang D, Mays VM, Hwang WC. Integrated mental health services in China: challenges  
5  
6  
7 2 and planning for the future. *Health Policy Plan* 2018; **33**(1): 107-22.  
8  
9 3 43. Zimmer Z, Kaneda T, Spess L. An examination of urban versus rural mortality in China  
10  
11 4 using community and individual data. *J Gerontol B Psychol Sci Soc Sci* 2007; **62**(5): S349-S57.  
12  
13  
14 5 44. Barbabella F, Melchiorre MG, Quattrini S, Papa R, Lamura G. European Observatory  
15  
16 6 Policy Briefs. In: Richardson E, van Ginneken E, eds. How can eHealth improve care for people  
17  
18 7 with multimorbidity in Europe? Copenhagen (Denmark): European Observatory on Health  
19  
20 8 Systems and Policies  
21  
22 © NIVEL and TU Berlin 2017.; 2017.  
23  
24  
25 9  
26  
27 10 45. Qiu P, Caine ED, Hou F, Cerulli C, Wittink MN. Depression as seen through the eyes of  
28  
29 11 rural Chinese women: Implications for help-seeking and the future of mental health care in  
30  
31 12 China. *Journal of affective disorders* 2018; **227**: 38-47.  
32  
33  
34 13 46. Andresen EM, Malmgren JA, Carter WB, Patrick DL. Screening for depression in well older  
35  
36 14 adults: evaluation of a short form of the CES-D (Center for Epidemiologic Studies Depression  
37  
38 15 Scale). *Am J Prev Med* 1994; **10**(2): 77-84.  
39  
40  
41  
42 16 47. Chen Y, Hicks A, While AE. Depression and related factors in older people in China: a  
43  
44 17 systematic review. *Reviews in Clinical Gerontology* 2012; **22**(1): 52-67.  
45  
46  
47  
48 18  
49  
50  
51  
52  
53  
54  
55  
56  
57  
58  
59  
60



Figure 1. Weighted percentage of population subgroups by number of chronic illness, urbanity, sex and age

180x93mm (300 x 300 DPI)

1  
2  
3  
4  
5  
6  
7  
8  
9  
10  
11  
12  
13  
14  
15  
16  
17  
18  
19  
20  
21  
22  
23  
24  
25  
26  
27  
28  
29  
30  
31  
32  
33  
34  
35  
36  
37  
38  
39  
40  
41  
42  
43  
44  
45  
46

**Appendix Table 1. Weighted prevalence of multimorbidity by sex, urbanity and age group**

| Panel A. Male          | 45-54 years old |       | 55-64 years old |       | 65-74 years old |       | 75 years and above old |       |
|------------------------|-----------------|-------|-----------------|-------|-----------------|-------|------------------------|-------|
|                        | Urban           | Rural | Urban           | Rural | Urban           | Rural | Urban                  | Rural |
| No illness             | 42.6%           | 35.3% | 29.0%           | 17.8% | 17.5%           | 12.3% | 10.8%                  | 14.4% |
| Single illness         | 24.6%           | 26.7% | 25.4%           | 25.4% | 22.8%           | 20.2% | 16.4%                  | 21.1% |
| <b>Multimorbidity</b>  |                 |       |                 |       |                 |       |                        |       |
| Two illnesses          | 12.9%           | 17.1% | 17.6%           | 22.6% | 18.3%           | 20.8% | 19.9%                  | 21.7% |
| Three illnesses        | 11.4%           | 11.7% | 12.4%           | 15.0% | 14.6%           | 17.5% | 26.3%                  | 15.8% |
| Four illnesses         | 4.4%            | 5.2%  | 8.8%            | 8.9%  | 11.2%           | 11.3% | 10.2%                  | 11.2% |
| Five or more illnesses | 4.1%            | 3.9%  | 6.8%            | 10.3% | 15.6%           | 18.0% | 16.4%                  | 15.8% |
| Panel B. Female        | 45-54 years old |       | 55-64 years old |       | 65-74 years old |       | 75 years and above old |       |
|                        | Urban           | Rural | Urban           | Rural | Urban           | Rural | Urban                  | Rural |
| No illness             | 36.9%           | 25.2% | 17.3%           | 13.5% | 16.7%           | 8.8%  | 16.6%                  | 12.0% |
| Single illness         | 26.9%           | 27.0% | 23.0%           | 19.0% | 17.7%           | 15.9% | 15.1%                  | 18.4% |
| <b>Multimorbidity</b>  |                 |       |                 |       |                 |       |                        |       |
| Two illnesses          | 17.2%           | 19.4% | 20.5%           | 21.7% | 15.7%           | 21.3% | 23.0%                  | 23.4% |
| Three illnesses        | 8.9%            | 12.6% | 16.7%           | 18.4% | 17.1%           | 18.9% | 18.0%                  | 17.1% |
| Four illnesses         | 5.0%            | 7.6%  | 10.2%           | 12.2% | 11.4%           | 14.0% | 10.7%                  | 13.5% |
| Five or more illnesses | 5.1%            | 8.3%  | 12.3%           | 15.2% | 21.4%           | 21.1% | 16.6%                  | 15.7% |

Note: Individual weight with household and individual non-response adjustment was used to calculate the weighted prevalence.

**Appendix Table 2. Odds ratios (OR) for multimorbidity by age, sex, marital status, education, former smoking and alcohol consumption, health insurance status and urbanity**

|                               | Ordered Logistic Model |               |
|-------------------------------|------------------------|---------------|
|                               | Odds Ratio             | 95% CI        |
| Age (year)                    | Reference              |               |
| 45-54                         | Reference              |               |
| 55-64                         | 1.545                  | [1.439,1.659] |
| 65-74                         | 2.238                  | [2.064,2.426] |
| ≥75                           | 1.885                  | [1.690,2.103] |
| Sex                           | Reference              |               |
| Male                          | 1.672                  | [1.527,1.830] |
| Female                        |                        |               |
| Educational level             | Reference              |               |
| Illiterate                    | 1.177                  | [1.082,1.281] |
| Part of primary school        | 1.109                  | [1.019,1.206] |
| Primary school                | 0.964                  | [0.882,1.054] |
| Junior middle school          | 0.940                  | [0.844,1.047] |
| Senior middle school or above |                        |               |
| Marital status                | Reference              |               |
| Not in marriage               | 0.850                  | [0.782,0.924] |
| Married                       |                        |               |
| Smoking                       | Reference              |               |
| Current                       | 1.502                  | [1.379,1.636] |
| Former                        | 0.940                  | [0.859,1.029] |
| Never                         |                        |               |
| Alcohol consumption           | Reference              |               |
| Current                       | 1.828                  | [1.665,2.008] |
| Former                        | 1.102                  | [1.028,1.181] |
| Never                         |                        |               |
| Health insurance status       |                        |               |
| Covered                       | Reference              |               |
| Not covered                   | 0.854                  | [0.776,0.941] |
| Urbanity                      |                        |               |
| Urban                         | Reference              |               |
| Rural                         | 1.064                  | [1.003,1.128] |
| N                             |                        | 16905         |

Note: Ordered logistic model was applied for five categories outcome which refers to absence or single illness, two illnesses, three illnesses, four illnesses, five illnesses or more.

STROBE Statement—checklist of items that should be included in reports of observational studies

|                              | Item No. | Recommendation                                                                                                                                                                                                                                                                                                                                                                                                                                                         | Page No. | Relevant text from manuscript |
|------------------------------|----------|------------------------------------------------------------------------------------------------------------------------------------------------------------------------------------------------------------------------------------------------------------------------------------------------------------------------------------------------------------------------------------------------------------------------------------------------------------------------|----------|-------------------------------|
| <b>Title and abstract</b>    | 1        | (a) Indicate the study’s design with a commonly used term in the title or the abstract                                                                                                                                                                                                                                                                                                                                                                                 | 2        | Cross-sectional               |
|                              |          | (b) Provide in the abstract an informative and balanced summary of what was done and what was found                                                                                                                                                                                                                                                                                                                                                                    | 2        |                               |
| <b>Introduction</b>          |          |                                                                                                                                                                                                                                                                                                                                                                                                                                                                        |          |                               |
| Background/rationale         | 2        | Explain the scientific background and rationale for the investigation being reported                                                                                                                                                                                                                                                                                                                                                                                   | 4        |                               |
| Objectives                   | 3        | State specific objectives, including any prespecified hypotheses                                                                                                                                                                                                                                                                                                                                                                                                       | 4        |                               |
| <b>Methods</b>               |          |                                                                                                                                                                                                                                                                                                                                                                                                                                                                        |          |                               |
| Study design                 | 4        | Present key elements of study design early in the paper                                                                                                                                                                                                                                                                                                                                                                                                                | 4        |                               |
| Setting                      | 5        | Describe the setting, locations, and relevant dates, including periods of recruitment, exposure, follow-up, and data collection                                                                                                                                                                                                                                                                                                                                        | 4        |                               |
| Participants                 | 6        | (a) <i>Cohort study</i> —Give the eligibility criteria, and the sources and methods of selection of participants. Describe methods of follow-up<br><i>Case-control study</i> —Give the eligibility criteria, and the sources and methods of case ascertainment and control selection. Give the rationale for the choice of cases and controls<br><i>Cross-sectional study</i> —Give the eligibility criteria, and the sources and methods of selection of participants | 4        |                               |
|                              |          | (b) <i>Cohort study</i> —For matched studies, give matching criteria and number of exposed and unexposed<br><i>Case-control study</i> —For matched studies, give matching criteria and the number of controls per case                                                                                                                                                                                                                                                 |          |                               |
| Variables                    | 7        | Clearly define all outcomes, exposures, predictors, potential confounders, and effect modifiers. Give diagnostic criteria, if applicable                                                                                                                                                                                                                                                                                                                               | 4-5      |                               |
| Data sources/<br>measurement | 8*       | For each variable of interest, give sources of data and details of methods of assessment (measurement). Describe comparability of assessment methods if there is more than one group                                                                                                                                                                                                                                                                                   | 4-5      |                               |
| Bias                         | 9        | Describe any efforts to address potential sources of bias                                                                                                                                                                                                                                                                                                                                                                                                              | 5        |                               |
| Study size                   | 10       | Explain how the study size was arrived at                                                                                                                                                                                                                                                                                                                                                                                                                              | 4        |                               |

Continued on next page

|                        |     |                                                                                                                                                                                                                                                                                                           |                |
|------------------------|-----|-----------------------------------------------------------------------------------------------------------------------------------------------------------------------------------------------------------------------------------------------------------------------------------------------------------|----------------|
| Quantitative variables | 11  | Explain how quantitative variables were handled in the analyses. If applicable, describe which groupings were chosen and why                                                                                                                                                                              | 5              |
| Statistical methods    | 12  | (a) Describe all statistical methods, including those used to control for confounding                                                                                                                                                                                                                     | 5              |
|                        |     | (b) Describe any methods used to examine subgroups and interactions                                                                                                                                                                                                                                       | Not applicable |
|                        |     | (c) Explain how missing data were addressed                                                                                                                                                                                                                                                               | 4              |
|                        |     | (d) <i>Cohort study</i> —If applicable, explain how loss to follow-up was addressed<br><i>Case-control study</i> —If applicable, explain how matching of cases and controls was addressed<br><i>Cross-sectional study</i> —If applicable, describe analytical methods taking account of sampling strategy | Not applicable |
|                        |     | (e) Describe any sensitivity analyses                                                                                                                                                                                                                                                                     | 5              |
| <b>Results</b>         |     |                                                                                                                                                                                                                                                                                                           |                |
| Participants           | 13* | (a) Report numbers of individuals at each stage of study—eg numbers potentially eligible, examined for eligibility, confirmed eligible, included in the study, completing follow-up, and analysed                                                                                                         | 5-6            |
|                        |     | (b) Give reasons for non-participation at each stage                                                                                                                                                                                                                                                      | 6              |
|                        |     | (c) Consider use of a flow diagram                                                                                                                                                                                                                                                                        |                |
| Descriptive data       | 14* | (a) Give characteristics of study participants (eg demographic, clinical, social) and information on exposures and potential confounders                                                                                                                                                                  |                |
|                        |     | (b) Indicate number of participants with missing data for each variable of interest                                                                                                                                                                                                                       |                |
|                        |     | (c) <i>Cohort study</i> —Summarise follow-up time (eg, average and total amount)                                                                                                                                                                                                                          |                |
| Outcome data           | 15* | <i>Cohort study</i> —Report numbers of outcome events or summary measures over time                                                                                                                                                                                                                       |                |
|                        |     | <i>Case-control study</i> —Report numbers in each exposure category, or summary measures of exposure                                                                                                                                                                                                      |                |
|                        |     | <i>Cross-sectional study</i> —Report numbers of outcome events or summary measures                                                                                                                                                                                                                        | 5-6            |
| Main results           | 16  | (a) Give unadjusted estimates and, if applicable, confounder-adjusted estimates and their precision (eg, 95% confidence interval). Make clear which confounders were adjusted for and why they were included                                                                                              | 6-7            |
|                        |     | (b) Report category boundaries when continuous variables were categorized                                                                                                                                                                                                                                 | 6-7            |
|                        |     | (c) If relevant, consider translating estimates of relative risk into absolute risk for a meaningful time period                                                                                                                                                                                          |                |

Continued on next page



|                          |    |                                                                                                                                                                            |      |                   |
|--------------------------|----|----------------------------------------------------------------------------------------------------------------------------------------------------------------------------|------|-------------------|
| Other analyses           | 17 | Report other analyses done—eg analyses of subgroups and interactions, and sensitivity analyses                                                                             | 5    |                   |
| <b>Discussion</b>        |    |                                                                                                                                                                            |      |                   |
| Key results              | 18 | Summarise key results with reference to study objectives                                                                                                                   | 9    |                   |
| Limitations              | 19 | Discuss limitations of the study, taking into account sources of potential bias or imprecision. Discuss both direction and magnitude of any potential bias                 | 9-10 |                   |
| Interpretation           | 20 | Give a cautious overall interpretation of results considering objectives, limitations, multiplicity of analyses, results from similar studies, and other relevant evidence | 9    |                   |
| Generalisability         | 21 | Discuss the generalisability (external validity) of the study results                                                                                                      | 9    |                   |
| <b>Other information</b> |    |                                                                                                                                                                            |      |                   |
| Funding                  | 22 | Give the source of funding and the role of the funders for the present study and, if applicable, for the original study on which the present article is based              | 10   | Funding Statement |

\*Give information separately for cases and controls in case-control studies and, if applicable, for exposed and unexposed groups in cohort and cross-sectional studies.

**Note:** An Explanation and Elaboration article discusses each checklist item and gives methodological background and published examples of transparent reporting. The STROBE checklist is best used in conjunction with this article (freely available on the Web sites of PLoS Medicine at <http://www.plosmedicine.org/>, Annals of Internal Medicine at <http://www.annals.org/>, and Epidemiology at <http://www.epidem.com/>). Information on the STROBE Initiative is available at [www.strobe-statement.org](http://www.strobe-statement.org).

# BMJ Open

## Urban-Rural Disparity in Prevalence of Multimorbidity in China: A Cross-sectional Nationally Representative Study

|                                 |                                                                                                                                                                                                                                                                      |
|---------------------------------|----------------------------------------------------------------------------------------------------------------------------------------------------------------------------------------------------------------------------------------------------------------------|
| Journal:                        | <i>BMJ Open</i>                                                                                                                                                                                                                                                      |
| Manuscript ID                   | bmjopen-2020-038404.R2                                                                                                                                                                                                                                               |
| Article Type:                   | Original research                                                                                                                                                                                                                                                    |
| Date Submitted by the Author:   | 19-Oct-2020                                                                                                                                                                                                                                                          |
| Complete List of Authors:       | Ma, Xiaochen; Peking University, China Center for Health Development Studies<br>He, Yu; London School of Hygiene & Tropical Medicine, Department of Non-communicable Disease Epidemiology<br>Xu, Jin; Peking University, China Center for Health Development Studies |
| <b>Primary Subject Heading</b>: | Epidemiology                                                                                                                                                                                                                                                         |
| Secondary Subject Heading:      | Global health, Geriatric medicine                                                                                                                                                                                                                                    |
| Keywords:                       | EPIDEMIOLOGY, GERIATRIC MEDICINE, PUBLIC HEALTH, Depression & mood disorders < PSYCHIATRY                                                                                                                                                                            |
|                                 |                                                                                                                                                                                                                                                                      |

SCHOLARONE™  
Manuscripts

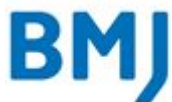

I, the Submitting Author has the right to grant and does grant on behalf of all authors of the Work (as defined in the below author licence), an exclusive licence and/or a non-exclusive licence for contributions from authors who are: i) UK Crown employees; ii) where BMJ has agreed a CC-BY licence shall apply, and/or iii) in accordance with the terms applicable for US Federal Government officers or employees acting as part of their official duties; on a worldwide, perpetual, irrevocable, royalty-free basis to BMJ Publishing Group Ltd ("BMJ") its licensees and where the relevant Journal is co-owned by BMJ to the co-owners of the Journal, to publish the Work in this journal and any other BMJ products and to exploit all rights, as set out in our [licence](#).

The Submitting Author accepts and understands that any supply made under these terms is made by BMJ to the Submitting Author unless you are acting as an employee on behalf of your employer or a postgraduate student of an affiliated institution which is paying any applicable article publishing charge ("APC") for Open Access articles. Where the Submitting Author wishes to make the Work available on an Open Access basis (and intends to pay the relevant APC), the terms of reuse of such Open Access shall be governed by a Creative Commons licence – details of these licences and which [Creative Commons](#) licence will apply to this Work are set out in our licence referred to above.

Other than as permitted in any relevant BMJ Author's Self Archiving Policies, I confirm this Work has not been accepted for publication elsewhere, is not being considered for publication elsewhere and does not duplicate material already published. I confirm all authors consent to publication of this Work and authorise the granting of this licence.

1  
2  
3  
4  
5  
6  
7  
8  
9  
10  
11  
12  
13  
14  
15  
16  
17  
18  
19  
20  
21  
22  
23  
24  
25  
26  
27  
28  
29  
30  
31  
32  
33  
34  
35  
36  
37  
38  
39  
40  
41  
42  
43  
44  
45  
46  
47  
48  
49  
50  
51  
52  
53  
54  
55  
56  
57  
58  
59  
60

1 **[Title page]**

2 **Title of the article: Urban-rural disparity in prevalence of multimorbidity in**  
3 **China: a cross-sectional nationally representative study**

4  
5  
6  
7  
8  
9  
10  
11 **The corresponding author:**

12 Full name: Jin Xu

13 Postal address: No. 38, Xueyuan Road, Haidian, Beijing, 100191, China

14 E-mail: xujin@hsc.pku.edu.cn

15 Telephone number: 0086-10-82805701

16  
17  
18  
19 **Full name, department, institution, city and country of all co-authors:**

20 First author: Xiaochen Ma

21 Department: China Center for Health Development Studies

22 Institution: Peking University

23 Country: China

24 Second author: Yu He

25 Department: Department of Non-communicable Disease Epidemiology

26 Institution: London School of Hygiene & Tropical Medicine

27 Country: United Kingdom

28 Third author: Jin Xu

29 Department: China Center for Health Development Studies

30 Institution: Peking University

31 Country: China

32 **Word count, excluding title page, abstract, references, figures and tables: 1841**

33 **Keywords:** multimorbidity, prevalence, China, rural, elderly

## 1 **Abstract**

### 2 **Background**

3 To address the neglect of depression in multimorbidity measurement and the lack of  
4 focus on rural population in previous literature about China, this paper aimed to  
5 estimate the prevalence of multimorbidity (including depressive disorders) among the  
6 country's rural and urban population.

### 8 **Methods**

9 We used a cross-sectional design and data from a nationally representative survey  
10 conducted in 2015–2016 among Chinese people aged 45 years or older involving  
11 19,656 participants. Multimorbidity was measured with a cut-off point of having two  
12 or more among 14 chronic illnesses. 13 of them were based on self-reported physician  
13 diagnosis. In addition, depressive disorders were assessed with the 10-item Center for  
14 Epidemiologic Studies Depression Scale (CES-D 10). The weighted prevalence of  
15 multimorbidity was calculated, with a non-response adjustment. Multivariate logistic  
16 regression was applied to analyze the relation between covariates and multimorbidity.

### 18 **Findings**

19 Multimorbidity was highly prevalent (54.3%) among the studied population. Contrary  
20 to previous studies, we found the prevalence of multimorbidity to be higher among the  
21 rural dwellers (58.3%) than among the urban population (50.4%). After adjustment for  
22 covariates, rural residents had 7.5% higher odds (95% CI of odds ratio: [1.003, 1.151])  
23 of having multimorbidity than their urban counterparts. Above 70% of chronic patients  
24 above 45 years old have multimorbidity, while 80.6%-97.9% of patients with any of  
25 the 14 chronic illnesses have multimorbidity.

### 27 **Interpretation**

28 Future health system development in China should transform from preventing and  
29 controlling non-communicable diseases as individual diseases to addressing people's  
30 comprehensive health needs under multimorbidity. The rural population should be  
31 prioritized as they suffered more from multimorbidity than the urban population.

1  
2  
3  
4  
5  
6  
7  
8  
9  
10  
11  
12  
13  
14  
15  
16  
17  
18  
19  
20  
21  
22  
23  
24  
25  
26  
27  
28  
29  
30  
31  
32  
33  
34  
35  
36  
37  
38  
39  
40  
41  
42  
43  
44  
45  
46  
47  
48  
49  
50  
51  
52  
53  
54  
55  
56  
57  
58  
59  
60

1 **[Article summary]**

2 **Strengths and limitations of this study**

- 3 ● This is the first study showing that rurality is associated with higher prevalence of multimorbidity  
4 in middle-aged and elderly Chinese.
- 5 ● We used nationally representative sample of the people above the age of 45 in China.
- 6 ● In our measurement of multimorbidity, we have included depressive disorders, a highly prevalent  
7 and important mental health condition in China but ignored in previous studies.
- 8 ● We used self-reported measurement for 13 of the 14 chronic illnesses studied, which is likely to  
9 cause underreporting as previous studies using administrative data reported higher prevalence of  
10 multimorbidity.
- 11 ● The lower accessibility to health care for chronic illnesses for rural population than for urban  
12 population means that the study has probably still underestimated the prevalence of multimorbidity  
13 in the rural population.  
14  
15

## [Main text]

### 1. Introduction

As global life expectancy rises, there is an increasing number of middle-aged and elderly with chronic disorders, both physical and mental. The co-occurrence of two or more chronic illnesses within a person is defined as multimorbidity.<sup>1</sup> Multimorbidity is a strong predictor of mortality.<sup>2</sup> It is also associated with reduced functional independence,<sup>3,4</sup> poor quality of life and well-being.<sup>5,6</sup> Multimorbidity also accounts for a disproportionately large share of health care utilizations and expenditures.<sup>7,8</sup> The implications go beyond extra spending. As most health systems were designed based on single diseases, issues such as poly-pharmacy pose enormous challenges for care coordination and patients' self-management.<sup>9</sup>

Although populations of low- and middle-income countries (LMICs) are generally younger than those in high-income countries, some major LMICs are ageing at particularly rapid paces. China is a case in point. While it took France almost 150 years for the proportion of people above 60 to increase from 10% to 20%,<sup>10</sup> the same proportion in China increased from 10.3% in 2000 to 17.6% in 2018 (those aged between 45 and 60 also increased from 15.4% to 23.6% during the same time).<sup>11</sup> The limited epidemiological evidence from LMICs gave a wide range of estimated prevalence of multimorbidity, e.g. from 9% to 83% in South Asia.<sup>12</sup> Given the likelihood of multimorbidity as population ages and its serious impact on health and well-being, accurate estimation of the prevalence of multimorbidity is important for LMICs like China.

Noteworthy, there is a higher percentage (20.5%) of old people (aged at or above 60) among the rural Chinese (accounting for 40.4% of all Chinese) than among their urban counterparts (16.1%),<sup>11</sup> likely due to emigration of younger rural adults to the urban area. As findings from a study done in South Africa suggests, multimorbidity may disproportionately affect the less well-off.<sup>13-15</sup> Despite improvement, quality care is less accessible in rural China compared to its urban areas<sup>16</sup>, as most rural primary care doctors still lack a full university degree.<sup>17</sup> Therefore, rural adults with chronic illnesses were at a higher risk of developing multimorbidity, meaning it is important particularly to study the rural situation.

We conducted a systematic literature search for published papers on prevalence of multimorbidity in China on 31 January 2020. We used search terms related to multimorbidity, prevalence and China on PubMed and Web of Science and did not apply language restrictions. Our search resulted in one systematic review that reported findings from local areas in China and five papers that covered nationwide prevalence. The systematic review (published in 2015) showed that most previous work about China focused on urban populations. Among the five papers, one was also restricted to urban population. The other four papers reported national prevalence of multimorbidity among middle-age and elderly Chinese.<sup>18-21</sup> These papers all used the same data set from the China Health and Retirement Longitudinal Study (CHARLS) and reported consistently higher prevalence of multimorbidity among urban population than rural population. Zhao et al. for example reported that rurality was associated with an odds ratio of 0.76 of multimorbidity in people above 50 years old.<sup>21</sup>

These studies have two important limitations. First, measurement of multimorbidity were all based on self-report. This is likely to cause underreporting which disproportionately affects rural population for whom health care is usually less accessible than urban population.<sup>22</sup> Second, these studies had neglected depression,<sup>19-21</sup> a most prevalent mental health condition among Chinese<sup>23</sup> and a condition widely covered in previous international multimorbidity studies.<sup>24,25</sup> As Lei et al. reported, prevalence of depressive symptoms in 2011/2012 was also found to be much higher among rural middle-aged and

1 elderly (35% for men and 49% for women) than among urban ones (23% for men and 35% for women),<sup>26</sup>  
2 though other estimation arrived at a range between 6.3% to 53.6%. Given the higher prevalence of  
3 depression among females than males, neglecting depression is also problematic from a gender equity  
4 perspective.

5 Limited scholarly focus on rural multimorbidity, reliance on self-reported diagnosis and neglect of  
6 depression all mean potentially substantial underestimation of the prevalence of multimorbidity and its  
7 consequences for health and wellbeing, particularly among China's rural population. This knowledge  
8 gap profoundly hinders the development of equity- and needs-oriented health policies. Hence, it is  
9 important to include investigator-assessed health conditions and measurement of depression with a focus  
10 on urban-rural disparity in studies on multimorbidity in China. This paper aimed to provide an updated  
11 estimation of national prevalence of multimorbidity among middle-age and older adults in China with  
12 the inclusion of depression and through the lens of urban-rural comparison.

## 15 2. Methods

### 17 *Study design and participants*

18 The study used a cross-sectional design and data from the China Health and Retirement  
19 Longitudinal Study (CHARLS). The longitudinal survey covers a nationally representative sample of  
20 adults aged 45 years or older. It includes assessments of social, economic and health circumstances of  
21 community residents. The detailed cohort profile was previously published. The participants of CHARLS  
22 closely resembled the Chinese national census population in terms of demographic characteristics.<sup>27</sup>

23 We used data from the latest wave of CHARLS collected in 2015-2016. All participants provided  
24 written informed consent, and survey protocols were approved by the Ethics Review Board at Peking  
25 University.<sup>27</sup> Of the 19,656 participants, a total of 2751 (14.0%) contained missing observations in  
26 variables. To address potential non-response bias, we weighed the samples using a survey weight variable  
27 provided by CHARLS, which gave sampled units (households and individuals) weights inversely  
28 proportional to their probability of having been selected and responded.<sup>28</sup>

### 30 *Measurement of multimorbidity*

31 In line with previous systematic review and studies done in China,<sup>7,24,25</sup> we used a disease count  
32 approach to measure multimorbidity. Following suggested cut-off point, a binary variable of coexistence  
33 of two or more chronic diseases/conditions within one individual constituted our main indication of  
34 multimorbidity. Partly due to the data restriction, the selection and definition of morbidities varies across  
35 previous multimorbidity studies, and no uniform operational measurement exists. We sought to include  
36 morbidities that were prevalent, which resulted in a list of 14 chronic illnesses.

37 Among these chronic illnesses, 13 (hypertension, diabetes, cancer, lung disease, heart problem,  
38 stroke, arthritis, dyslipidemia, liver disease, kidney disease, stomach disease, asthma and memory  
39 problem) were assessed based on self-reported diagnosis by a doctor. Participants were asked "have you  
40 been diagnosed with [conditions listed below, read by interviewers one by one] by a doctor?" Due to the  
41 health system reform in the recent decade, most people in China are covered by basic social health  
42 insurance and the Essential Public Health Service Scheme that covered the screening and management  
43 (e.g. follow-up) of a range of prevalent non-communicable conditions (hypertension, diabetes, severe  
44 mental disorders, breast cancer, etc.<sup>29</sup>). Regular checkup is now universally provided to all elderly above



1 65 years old. Most also have a community-based primary health care facility in their neighborhood.  
2 Access to care is generally good, though quality differs. On average, every Chinese visit health facilities  
3 5.6 times per year in 2015.<sup>30</sup> However, continued urban-rural gaps in health service benefits and access  
4 meant that there would likely be underreporting of chronic conditions.<sup>22,31</sup> In addition, depressive  
5 disorders were assessed with 10-item Center for Epidemiologic Studies Depression Scale (CES-D 10).  
6 We consider the implications of using alongside self-reported physician diagnosis in the discussion  
7 section. In a sensitive analysis, an ordinal measure of multimorbidity (absence or single illness, two  
8 illnesses, three illnesses, four illnesses, five illnesses or more) was considered.

### 9 10 **Covariates**

11 This study collected a range of demographic, socioeconomic, behavioral and health insurance  
12 covariates, including age group (45-54 years old, 55-64 years old, 65-74 years old, 75 years and above),  
13 sex (male or female), marital status (married, otherwise), educational attainment (illiterate, partial  
14 primary school, completed primary school, middle school, or high school or above), smoking (current,  
15 former or never), alcohol drinking (current, former or never), health insurance status (covered or not),  
16 and urbanity (urban vs. rural residence).

17 Urban or rural residence was measured based on the administrative classification of the participants'  
18 basic residing community. The basic rural resident community is a *cun* (literally meaning village), while  
19 a basic urban resident community is a *jiedao* (literally meaning street). Rural communities are usually  
20 far away from city or county centers, while urban ones are much closer. Equally important as physical  
21 distance was the fact that separated social policies applied for urban and rural communities in China. In  
22 recent years, entitlement differences between rural and urban areas regarding healthcare and social  
23 welfare are being reduced, though substantial pro-urban gaps remain.<sup>32</sup> In 2015, the average annual  
24 disposable income of urban residents was 31,194.8 *yuan* (6.23 Chinese *yuan* = 1 US dollar in 2015), or  
25 2.73 times that of rural residents (11,421.7 *yuan*).<sup>33</sup>

### 26 27 **Statistical analysis**

28 Frequencies (percentages) are reported to summarize the distribution of participants' characteristics.  
29 Weighted prevalence of individual chronic diseases and multimorbidity was calculated with adjustment  
30 using the survey weight. The distribution of multimorbidity by subpopulations was examined by  
31 stratified analysis of urbanity, sex and age groups. Multivariate logistic regression was applied to analyze  
32 the associations between covariates and the binary outcome of multimorbidity. A sensitivity analysis was  
33 conducted using ordered logit regressions to examine the relation between the same covariates and the  
34 ordinal outcome of multimorbidity.

### 35 36 **3. Results**

37  
38 Table 1 presents the characteristics of the study population and their weighted prevalence of  
39 multimorbidity. Among the 19,656 participants, the mean age was 60.2 years, 51.3% were female, and  
40 59.8% were from rural areas. 54.3% of the weighted sample had multimorbidity. Among the remainder,  
41 about half (22.8% of the sample) had only one of the 14 conditions, while the other half (22.9%) had  
42 none. In other words, 70.4% of all chronic patients had multimorbidity. The prevalence of multimorbidity  
43 generally increased as people aged.

1 **Table 1. Characteristics of study population and weighted prevalence of multimorbidity**

|                               | N      | (%)     | Weighted Prevalence † |             |                        |
|-------------------------------|--------|---------|-----------------------|-------------|------------------------|
|                               |        |         | No illness            | One illness | Multi-morbidities (≥2) |
| Total                         | 19,656 | (100%)  | 22.9%                 | 22.8%       | 54.3%                  |
| Age (year)                    |        |         |                       |             |                        |
| 45-54                         | 6792   | (34.6%) | 35.0%                 | 26.3%       | 38.7%                  |
| 55-64                         | 6604   | (33.6%) | 19.3%                 | 23.2%       | 57.6%                  |
| 65-74                         | 4310   | (21.9%) | 13.7%                 | 19.1%       | 67.1%                  |
| ≥75                           | 1950   | (9.9%)  | 13.5%                 | 17.6%       | 68.9%                  |
| Sex                           |        |         |                       |             |                        |
| Male                          | 9573   | (48.7%) | 25.7%                 | 23.9%       | 50.4%                  |
| Female                        | 10083  | (51.3%) | 20.3%                 | 21.7%       | 58.0%                  |
| Educational level             |        |         |                       |             |                        |
| Illiterate                    | 4985   | (25.4%) | 15.8%                 | 22.5%       | 61.7%                  |
| Part of primary school        | 3252   | (16.6%) | 14.8%                 | 20.0%       | 65.2%                  |
| Primary school                | 5352   | (27.3%) | 32.7%                 | 22.8%       | 44.5%                  |
| Junior middle school          | 3804   | (19.4%) | 21.4%                 | 24.0%       | 54.5%                  |
| Senior middle school or above | 2237   | (11.4%) | 25.9%                 | 24.4%       | 49.7%                  |
| Unknown*                      | 26     | (0.1%)  |                       |             |                        |
| Marital status                |        |         |                       |             |                        |
| Not in marriage               | 2666   | (13.6%) | 15.6%                 | 17.8%       | 66.6%                  |
| Married                       | 16989  | (86.4%) | 24.2%                 | 23.6%       | 52.2%                  |
| Unknown*                      | 1      | (0.0%)  |                       |             |                        |
| Smoking                       |        |         |                       |             |                        |
| Current                       | 5568   | (28.4%) | 25.6%                 | 24.3%       | 50.1%                  |
| Former                        | 3112   | (15.9%) | 17.8%                 | 20.6%       | 61.5%                  |
| Never                         | 10929  | (55.7%) | 22.8%                 | 22.7%       | 54.5%                  |
| Unknown*                      | 47     | (0.2%)  |                       |             |                        |
| Alcohol consumption           |        |         |                       |             |                        |
| Current                       | 6947   | (35.5%) | 27.7%                 | 24.8%       | 47.6%                  |
| Former                        | 2213   | (11.3%) | 13.8%                 | 19.5%       | 66.7%                  |
| Never                         | 10427  | (53.2%) | 21.3%                 | 22.1%       | 56.6%                  |
| Unknown*                      | 69     | (0.4%)  |                       |             |                        |
| Health insurance status       |        |         |                       |             |                        |
| Covered                       | 15406  | (90.9%) | 16.2%                 | 22.0%       | 61.7%                  |
| Not covered                   | 1549   | (9.1%)  | 20.3%                 | 21.9%       | 57.7%                  |
| Unknown*                      | 2701   | (13.7%) |                       |             |                        |
| Urbanity                      |        |         |                       |             |                        |
| Urban                         | 7908   | (40.2%) | 26.7%                 | 23.0%       | 50.4%                  |
| Rural                         | 11748  | (59.8%) | 19.2%                 | 22.6%       | 58.3%                  |

Note: † Individual weight with household and individual non-response adjustment was used to calculate the weighted prevalence. \* “Unknown” means that no response from the interviewed participants was recorded for the question.

1  
2  
3  
4 1  
5 2 Figure 1 shows the weighted proportion of population subgroups by number of chronic illnesses,  
6 3 urbanity, sex and age. Except for male above 75 years old, prevalence of multimorbidity was consistently  
7 4 higher among rural population in all age groups in both sexes. Women, no matter urban or rural, were  
8 5 more likely to suffer from multimorbidity in all age groups. People in general were more likely to have  
9 6 more chronic illnesses as they aged. The trends became inconsistent when people became older than 75  
10 7 years. Detailed prevalence is provided in Appendix Table 1.  
11 8

12 9 [Please insert the image of Figure 1 here.]

13 10 **Figure 1. Weighted percentage of population subgroups by number of chronic illness, urbanity,**  
14 11 **sex and age**  
15 12

16 13 Table 2 presents the factors associated with multimorbidity. In the multivariate logistic model, older  
17 14 age, being female, not in marriage, without education level of middle school or above, former smoking  
18 15 and alcohol drinking, health insurance coverage, and rural residence were significantly associated with  
19 16 higher odds of having multimorbidity. After adjusting for age, sex, education, marital status, smoking,  
20 17 alcohol consumption, and insurance coverage, rural residents had 7.5% higher odds (95% CI of odds  
21 18 ratio: [1.003,1.151]) of having multimorbidity than urban residents. In the sensitivity analysis,  
22 19 multivariate ordered logistic model using an ordinal measure of multimorbidity yields a similar pattern  
23 20 that rural residents had 6.4% higher odds (95% CI of odds ratio: [1.003,1.128]) of having multimorbidity  
24 21 compared with urban residents, adjusted for the same covariates (Appendix Table 2).  
25 22

1 **Table 2. Odds ratios (OR) for multimorbidity by age, sex, marital status, education, former**  
 2 **smoking and alcohol consumption, health insurance status and urbanity**

|                               | Logistic Model |               |
|-------------------------------|----------------|---------------|
|                               | Odds Ratio     | 95% CI        |
| Age (year)                    |                |               |
| 45-54                         | Reference      |               |
| 55-64                         | 1.546          | [1.428,1.674] |
| 65-74                         | 2.177          | [1.982,2.392] |
| ≥75                           | 1.908          | [1.676,2.173] |
| Sex                           |                |               |
| Male                          | Reference      |               |
| Female                        | 1.649          | [1.484,1.832] |
| Educational level             |                |               |
| Illiterate                    | Reference      |               |
| Part of primary school        | 1.150          | [1.039,1.274] |
| Primary school                | 1.077          | [0.974,1.190] |
| Junior middle school          | 0.932          | [0.840,1.034] |
| Senior middle school or above | 0.838          | [0.742,0.947] |
| Marital status                |                |               |
| Not in marriage               | Reference      |               |
| Married                       | 0.843          | [0.761,0.934] |
| Smoking                       |                |               |
| Current                       | Reference      |               |
| Former                        | 1.478          | [1.336,1.634] |
| Never                         | 0.956          | [0.862,1.061] |
| Alcohol consumption           |                |               |
| Current                       | Reference      |               |
| Former                        | 1.769          | [1.575,1.987] |
| Never                         | 1.061          | [0.980,1.150] |
| Insurance coverage            |                |               |
| Covered                       | Reference      |               |
| Not covered                   | 0.816          | [0.730,0.912] |
| Urbanity                      |                |               |
| Urban                         | Reference      |               |
| Rural                         | 1.075          | [1.003,1.151] |
| N                             | 16905          |               |

3 Note: Logistic model was applied for binary outcome which refers to 1 as coexistence of two  
 4 or more chronic diseases and/or conditions within one person.

7 Table 3 reports the proportion of people with a given condition amongst the 14 chronic diseases,  
 8 and the prevalence of multimorbidity among patients with the given conditions. As much as 42.8% of  
 9 Chinese at or above 45 years old had arthritis, which was the most prevalent condition. This was followed  
 10 by hypertension (34.6%), depressive disorders (31.1%) and stomach disease (31%). Compared to urban

1 residents, rural population were much more likely to be affected by arthritis (rural vs urban = 48.3% vs  
2 36.5%), depressive disorders (36.8% vs 24.7%), while urban population were more likely to have  
3 dyslipidemia (26.1% vs 14.3%).

4 Chronic patients from both urban and rural areas were predominantly having multimorbidity (83.6%-  
5 97.6% overall, 80.6%-97.6% in urban population, and 84.5%-97.9% in rural population). Only among  
6 kidney disease patients were urban conditional prevalence of multimorbidity higher than rural  
7 conditional prevalence of multimorbidity. For any of the remaining 13 types, rural chronic patients were  
8 more likely to have multimorbidity than urban ones. The maximal difference between rural and urban  
9 conditional prevalence of multimorbidity among chronic patients of any of the 14 types was 4.4  
10 percentage point, observed in dyslipidemia.

11  
12 **Table 3. Prevalence of chronic diseases and conditional prevalence of multimorbidity among**  
13 **patients with at least one of 14 chronic diseases (aged at or above 45 years old)**

| Chronic diseases     | Proportion of patients with a given condition |       |       | Prevalence of multimorbidity among patients with the given condition |       |       |
|----------------------|-----------------------------------------------|-------|-------|----------------------------------------------------------------------|-------|-------|
|                      | Total                                         | Urban | Rural | Total                                                                | Urban | Rural |
| Arthritis            | 42.8%                                         | 36.5% | 48.3% | 86.7%                                                                | 86.6% | 86.7% |
| Hypertension         | 34.6%                                         | 37.1% | 32.3% | 86.9%                                                                | 85.7% | 88.1% |
| Depressive disorders | 31.1%                                         | 24.7% | 36.8% | 83.0%                                                                | 80.6% | 84.5% |
| Stomach disease      | 31.0%                                         | 27.3% | 34.2% | 87.3%                                                                | 84.8% | 89.1% |
| Dyslipidemia         | 19.8%                                         | 26.1% | 14.3% | 91.4%                                                                | 89.8% | 94.2% |
| Heart problem        | 18.8%                                         | 21.8% | 16.0% | 94.4%                                                                | 93.3% | 95.8% |
| Lung disease         | 15.0%                                         | 13.7% | 16.1% | 92.8%                                                                | 92.4% | 93.1% |
| Diabetes             | 10.9%                                         | 13.9% | 8.3%  | 94.0%                                                                | 93.1% | 95.4% |
| Kidney disease       | 10.2%                                         | 10.3% | 10.1% | 94.4%                                                                | 95.2% | 93.7% |
| Liver disease        | 7.4%                                          | 8.5%  | 6.4%  | 91.8%                                                                | 90.2% | 93.6% |
| Asthma               | 6.0%                                          | 5.3%  | 6.7%  | 97.6%                                                                | 97.6% | 97.7% |
| Stroke               | 3.8%                                          | 4.3%  | 3.4%  | 96.6%                                                                | 95.4% | 97.9% |
| Memory problem       | 2.8%                                          | 2.8%  | 2.9%  | 94.6%                                                                | 94.1% | 95.1% |
| Cancer               | 1.9%                                          | 2.0%  | 1.7%  | 87.2%                                                                | 85.2% | 89.4% |

14 Note: Individual weight with household and individual non-response adjustment was used to calculate  
15 prevalence.

#### 16 4. Discussion

17 Our study using nationally representative data revealed a high prevalence (54.3%) of  
18 multimorbidity among middle-aged or elderly adults in China. Extrapolating this figure to the entire  
19 national population of adults aged 45 or above, we estimate that there are over 240 million middle-aged  
20 or elderly Chinese with multimorbidity.<sup>34</sup> Our estimation of multimorbidity prevalence among people  
21 aged at or above 45 in China is higher than previous estimations (42.4%) using a similar dataset.<sup>19</sup>

22 The main reason for the difference seems to be our inclusion of depression. As 24.7% of urban  
23 residents and 36.8% of rural residents above the age of 45 had depressive symptoms, depression is indeed  
24 a highly prevalent condition that merits inclusion in disease counts for multimorbidity. The level of  
25 prevalence of depression is consistent with previous studies using a similar dataset.<sup>26</sup> Of note, the

1 numbers are substantially lower compared to a nation-wide study on mental health using the World  
2 Mental Health Composite International Diagnostic Interview developed by the World Health  
3 Organization, which reported a 12-month prevalence of 3.6% among all Chinese in 2013.<sup>23</sup> However,  
4 the Composite International Diagnostic Interview was found to have high specificity and low sensitivity,  
5 thus the tool likely leads to substantial underestimation of the prevalence of depression.<sup>35</sup>

6 We also found that women were more likely to be multimorbid, consistent with a previous study in  
7 China.<sup>19</sup> It is likely due to the fact that women are better at expressing their conditions<sup>36</sup> and take better  
8 care of their health by checking out their illnesses with doctors.<sup>37</sup> In addition, multimorbidity is associated  
9 with a range of social and behavioral factors, such as lower education status, former smoking and alcohol  
10 consumption, being unmarried or divorced and lacking health insurance coverage.

11 Most chronic patients (70.4%) were likely to be multimorbid. People with a given condition out of  
12 our index chronic illnesses were very likely to be multimorbid (83.6%-97.6%). In other words, chronic  
13 illnesses rarely existed in a person as a single morbidity. A previous study using claims data found that  
14 82% of all elderly patients (aged at or above 60) covered by Urban Employees Basic Medical Insurance  
15 in Beijing had multimorbidity.<sup>38</sup>

16 Given that conditional prevalence of multimorbidity is very high (i.e. above 83%) among patients  
17 with a given condition from the 14 chronic diseases, the most prevalent ones (i.e. arthritis, hypertension,  
18 depressive disorders, stomach disease, with a prevalence higher than 30%) seem to have substantially  
19 contributed to the high prevalence of multimorbidity. The list of prevalent conditions (arthritis,  
20 hypertension, depressive disorders, stomach disease, dyslipidemia, heart problem, lung disease, diabetes,  
21 and kidney disease, all with a prevalence above 10%) is very similar with the findings of a systematic  
22 review from South Asia,<sup>12</sup> except that the studies included in that systematic review had not counted in  
23 depressive disorders, stomach disease and dyslipidemia, which were prevalent in China, and that skin  
24 diseases, prevalent in South Asia, were left out in the survey we used.

25 Physical chronic diseases have also been found associated with an increased risk of depressive  
26 symptoms. A previous study using CHARLS data also reported that patients with one, two, and three or  
27 more chronic physical conditions were 21%, 66%, and 111% more likely than those without any chronic  
28 physical condition to be affected by depressive symptoms.<sup>39</sup> The relation seems to work both ways.  
29 Patients with baseline hypertension were more likely to have depressive symptoms than those without  
30 hypertension in follow-up surveys, particularly in rural areas.<sup>40</sup> Meanwhile, major depression in the  
31 previous year was also found to be associated with an increased risk of ischemic heart disease in Chinese  
32 adults, independent of other major cardiovascular risk factors. In terms of access to care, despite reforms  
33 aiming at primary care strengthening and development in programs to address non-communicable  
34 diseases, there is still much challenge in the quality of primary care that hinders control of prevalent  
35 chronic physical conditions like hypertension and diabetes in China.<sup>31,41</sup> Furthermore, mental health  
36 service is yet to be well integrated into China's general health system.<sup>42</sup> These health system constraints  
37 probably contributed to the coexistence of high prevalence of chronic physical conditions and depression.

38 We found the prevalence of multimorbidity to be higher among the rural dwellers (58.3%) than  
39 among the urban population (50.4%) in 2015. This revised the previously consistent finding that urban  
40 residents were more likely to have multimorbidity than rural population.<sup>18,19,21</sup> The higher prevalence of  
41 multimorbidity among rural residents than among urban residents was shown in almost all age groups in  
42 both sexes in our study. The rural-urban difference seems to be driven by the high rural prevalence of  
43 arthritis, depressive disorders, stomach disease and lung disease. We have further shown that  
44 multimorbidity was more prevalent among rural patients with at least one of 13 of the 14 chronic illnesses

1 studied than among their urban counterparts. Again, our inclusion of depression seems to be a main  
2 reason that we have found higher prevalence of multimorbidity among rural population than among urban  
3 population. Compared to urban population, rural population's lower socio-economic status, poorer  
4 childhood health, poorer social services, and poorer access to quality health services (including  
5 diagnostic testing), as well as the very nature of rural residence and lifestyle, might all have contributed  
6 to their substantially higher prevalence of depression.<sup>26,31,39</sup>

7 Our findings have some important implications. First, given the prevalence of the multimorbidity  
8 epidemic and its dominance among chronic patients, it is imperative that China move from its current  
9 hospital-centric model with fragmented care across specialties and facilities towards an approach of  
10 people-centered integrated care built on strong primary care. Second, since rural population have higher  
11 prevalence of multimorbidity, priority for health system transformation (and related research) to address  
12 multimorbidity lies in the rural areas, where the needs are the greatest and service providers are less  
13 qualified and located more sparsely. Third, within the shorter life expectancy among rural population,<sup>43</sup>  
14 they also seem more severely affected by multimorbidity. The impact of multimorbidity on rural people's  
15 lives therefore deserves greater attention. Fourth, one out of four Chinese aged 45 or above were affected  
16 by depression and at least one chronic physical disorder. This combination came with potentially severe  
17 consequences on their wellbeing.<sup>6</sup> It is particularly important that mental health be integrated at an  
18 affordable cost to primary care.

19 Considering the importance of primary care in addressing multiple diseases in a coordinated and  
20 continuous manner, it seems critical to strengthen primary care so that equally good-quality integrated  
21 services can be provided to both rural and urban Chinese. Meanwhile, improving physical capacity and  
22 human resources at primary care facilities may be a long-term process. Digital health solutions such as  
23 telemedicine may be potentially valuable in facilitating support for front-liner providers (by facilitating  
24 better communication and information sharing), patients and their care-givers (by providing self-  
25 management tools)<sup>44</sup> both in the short term and in the long run. Meanwhile, issues like cost and  
26 mobilization of health professionals need to be addressed, for digital health interventions to work at all.  
27 As the Chinese government continuously pushed forward the agenda of digital health, how digital health  
28 interventions can better address the pro-urban gaps in multimorbidity deserves greater attention. Public  
29 finance is needed to allow resources online to flow towards the remote rural areas.

30 The present study has two strengths. First, we used nationally representative sample of the people  
31 above the age of 45 in China. Second, we have included depression in our measurement of  
32 multimorbidity following the practice suggested in two systematic reviews.<sup>24,25</sup>

33 There are also limitations of the study. First, we used self-reported diagnosis by physicians for 13  
34 of the 14 chronic illnesses studied. Despite China's recent health system development which extended  
35 essential health care coverage to all its population, health care for chronic illnesses is still less accessible  
36 for rural population.<sup>31</sup> Underdiagnosis of chronic illnesses (for example, diabetes) is likely to be more  
37 common in rural areas than in urban areas.<sup>22</sup> Hence, the actual urban-rural multimorbidity difference  
38 might be even larger than the current estimate.

39 Second, depression was measured by a scale (i.e. CES-D 10), unlike the other 13 conditions. The  
40 main reason is that depression was only available through CES-D 10. As the capacity of mental health  
41 service is weak in China, particularly at the primary care level,<sup>42</sup> depression is likely underdiagnosed in  
42 China overall and particularly among rural population. A study has reported that a substantial proportion  
43 of rural Chinese women would attribute depressive disorders to social causes and were not likely to visit  
44 a doctor when having depressive disorders.<sup>45</sup> The CES-D 10 scale was validated as a screening

1  
2  
3 1 instrument for depression <sup>46</sup> and appeared more suitable for our measurement of depression within the  
4 2 constraints of available data. Meanwhile, some had claimed that the scale has high sensitivity (low false  
5 3 negative) but low specificity (high false positive).<sup>47</sup> Hence, we might have over-estimated prevalence of  
6 4 depressive symptoms and its impact on overall prevalence of multimorbidity, though the effects are not  
7 5 likely to differ substantially across urban and rural areas.  
8  
9  
10  
11  
12

## 13 8 **5. Conclusion**

14 9 Our study estimated that over half of Chinese aged 45 years or above have two or more chronic  
15 10 medical conditions. Contrary to previous studies, we have provided clear evidence that multimorbidity  
16 11 is more prevalent among rural population (58.3%) than among their urban counterparts (50.4%). Above  
17 12 70% of chronic patients aged 45 years or above have multimorbidity. The prevalence of multimorbidity  
18 13 among patients with one of the 14 chronic illnesses included in this study was even higher and ranged  
19 14 between 80.6% and 97.9%. A critical driver of the rural-urban disparity in multimorbidity is the high  
20 15 prevalence of depression in rural areas. Future health system development in China should transform  
21 16 from preventing and controlling non-communicable diseases as individual diseases to addressing  
22 17 people's comprehensive health need under multimorbidity. The priority for such transformation is the  
23 18 rural areas.  
24  
25  
26  
27  
28

## 29 20 **Contributorship statement**

30 21 Jin Xu and Yu He did the literature review. Jin Xu and Xiaochen Ma did the study design. All  
31 22 authors participated in data analysis. Jin Xu, Yu He and Xiaochen Ma jointly wrote the first draft,  
32 23 participated in the revision of the draft and versions of the manuscript. All authors provided comments  
33 24 and confirmed the finalized version.  
34  
35

## 36 26 **Ethics statement**

37 27 We used data from the China Health and Retirement Longitudinal Study. The survey and protocols  
38 28 were approved by the Peking University Ethics Review Board.  
39  
40

## 41 30 **Funding statement**

42 31 The study is funded by Natural Science Foundation of China (No. 71804004). The funder of the  
43 32 study had no role in study design, data collection, data analysis, data interpretation, or writing of the  
44 33 report.  
45  
46

## 47 34 **Competing interests**

48 35 None declared.  
49  
50

## 51 37 **Data sharing statement**

52 38 All the data in the study are publicly available via the official website of the China Health and  
53 39 Retirement Longitudinal Study (<http://charls.pku.edu.cn/>).  
54  
55

## 56 41 **Patient and Public Involvement statement**

57  
58  
59  
60



1 Patients and the public were not directly involved in the development of the research question or  
2 outcome measures of the study, nor were they involved in study design and execution. There are no plans  
3 to disseminate the research to study participants.

#### 4 5 **References**

6 1. World Health Organization. World report on ageing and health. Geneva, Switzerland:  
7 World Health Organization, 2015.

8 2. Dugravot A, Fayosse A, Dumurgier J, et al. Social inequalities in multimorbidity, frailty,  
9 disability, and transitions to mortality: a 24-year follow-up of the Whitehall II cohort study. *Lancet*  
10 *Public Health* 2019; S2468-667(19)30226-9.

11 3. Marventano S, Ayala A, Gonzalez N, et al. Multimorbidity and functional status in  
12 community-dwelling older adults. *European journal of internal medicine* 2014; **25**(7): 610-6.

13 4. Wang X-X, Lin W-Q, Chen X-J, et al. Multimorbidity associated with functional  
14 independence among community-dwelling older people: a cross-sectional study in Southern  
15 China. *Health and Quality of Life Outcomes* 2017; **15**(1): 73.

16 5. Gu J, Chao J, Chen W, et al. Multimorbidity and health-related quality of life among the  
17 community-dwelling elderly: A longitudinal study. *Archives of gerontology and geriatrics* 2018;  
18 **74**: 133-40.

19 6. Coventry PA, Dickens C, Todd C. How does mental-physical multimorbidity express itself  
20 in lived time and space? A phenomenological analysis of encounters with depression and  
21 chronic physical illness. *Social science & medicine* 2014; **118**: 108-18.

22 7. Chen H, Cheng M, Zhuang Y, Broad JB. Multimorbidity among middle-aged and older  
23 persons in urban China: Prevalence, characteristics and health service utilization. *Geriatr*  
24 *Gerontol Int* 2018; **18**(10): 1447-52.

25 8. Hopman P, Heins MJ, Korevaar JC, Rijken M, Schellevis FG. Health care utilization of

- 1 patients with multiple chronic diseases in the Netherlands: Differences and underlying factors.  
2  
3  
4  
5  
6  
7  
8  
9  
10  
11  
12  
13  
14  
15  
16  
17  
18  
19  
20  
21  
22  
23  
24  
25  
26  
27  
28  
29  
30  
31  
32  
33  
34  
35  
36  
37  
38  
39  
40  
41  
42  
43  
44  
45  
46  
47  
48  
49  
50  
51  
52  
53  
54  
55  
56  
57  
58  
59  
60
- 1 patients with multiple chronic diseases in the Netherlands: Differences and underlying factors.  
2 *European journal of internal medicine* 2016; **35**: 44-50.
  - 3 9. Pearson-Stuttard J, Ezzati M, Gregg EW. Multimorbidity—a defining challenge for health  
4 systems. *The Lancet Public Health* 2019; **4**(12): e599-e600.
  - 5 10. World Health Organization. 10 Facts on Ageing And The Life Course. 2020.  
6 [https://www.who.int/features/factfiles/ageing/ageing\\_facts/en/](https://www.who.int/features/factfiles/ageing/ageing_facts/en/) (accessed 1 July 2020).
  - 7 11. Academy of Medical Sciences. Multimorbidity: a priority for global health research, 2018.
  - 8 12. Pati S, Swain S, Hussain MA, et al. Prevalence and outcomes of multimorbidity in South  
9 Asia: a systematic review. *BMJ Open* 2015; **5**(10): e007235.
  - 10 13. Ataguba JE-O. Inequalities in multimorbidity in South Africa. *International Journal for*  
11 *Equity in Health* 2013; **12**(1): 64.
  - 12 14. Khanam MA, Streatfield PK, Kabir ZN, Qiu C, Cornelius C, Wahlin Å. Prevalence and  
13 patterns of multimorbidity among elderly people in rural Bangladesh: a cross-sectional study.  
14 *Journal of health, population, and nutrition* 2011; **29**(4): 406-14.
  - 15 15. Boutayeb A, Boutayeb S, Boutayeb W. Multi-morbidity of non communicable diseases and  
16 equity in WHO Eastern Mediterranean countries. *International Journal for Equity in Health* 2013;  
17 **12**(1): 60.
  - 18 16. Li J, Shi L, Liang H, Ding G, Xu L. Urban-rural disparities in health care utilization among  
19 Chinese adults from 1993 to 2011. *BMC health services research* 2018; **18**(1): 102.
  - 20 17. Xu J, Mills A. Challenges for gatekeeping: a qualitative systems analysis of a pilot in rural  
21 China. *Int J Equity Health* 2017; **16**(1): 106.
  - 22 18. Yi JY, Kim H, Chi I. Urban-rural differences in multimorbidity and associated factors in

- 1  
2  
3  
4 1 China and Korea: A population-based survey study. *Geriatr Gerontol Int* 2019; **19**(11): 1157-  
5  
6 64.  
7  
8  
9 3 19. Yao SS, Cao GY, Han L, et al. Prevalence and patterns of multimorbidity in a nationally  
10  
11 4 representative sample of older Chinese: results from CHARLS. *J Gerontol A Biol Sci Med Sci*  
12  
13 5 2019.  
14  
15  
16 6 20. Zhang R, Lu Y, Shi L, Zhang S, Chang F. Prevalence and patterns of multimorbidity among  
17  
18 7 the elderly in China: a cross-sectional study using national survey data. *BMJ open* 2019; **9**(8):  
19  
20 8 e024268-e.  
21  
22  
23 9 21. Zhao Y, Atun R, Oldenburg B, et al. Physical multimorbidity, health service use, and  
24  
25 10 catastrophic health expenditure by socioeconomic groups in China: an analysis of population-  
26  
27 11 based panel data. *The Lancet Global health* 2020; **8**(6): e840-e9.  
28  
29  
30 12 22. Yuan X, Liu T, Wu L, Zou ZY, Li C. Validity of self-reported diabetes among middle-aged  
31  
32 13 and older Chinese adults: the China Health and Retirement Longitudinal Study. *BMJ Open*  
33  
34 14 2015; **5**(4): e006633.  
35  
36  
37 15 23. Huang Y, Wang Y, Wang H, et al. Prevalence of mental disorders in China: a cross-  
38  
39 16 sectional epidemiological study. *Lancet Psychiatry* 2019; **6**(3): 211-24.  
40  
41  
42 17 24. Prados-Torres A, Calderón-Larrañaga A, Hanco-Saavedra J, Poblador-Plou B, van den  
43  
44 18 Akker M. Multimorbidity patterns: a systematic review. *Journal of Clinical Epidemiology* 2014;  
45  
46 19 **67**(3): 254-66.  
47  
48  
49 20 25. Johnston MC, Crilly M, Black C, Prescott GJ, Mercer SW. Defining and measuring  
50  
51 21 multimorbidity: a systematic review of systematic reviews. *European journal of public health*  
52  
53 22 2019; **29**(1): 182-9.  
54  
55  
56  
57  
58  
59  
60

- 1  
2  
3  
4 1 26. Lei X, Sun X, Strauss J, Zhang P, Zhao Y. Depressive symptoms and SES among the  
5  
6  
7 2 mid-aged and elderly in China: evidence from the China Health and Retirement Longitudinal  
8  
9 3 Study national baseline. *Social science & medicine (1982)* 2014; **120**: 224-32.  
10  
11  
12 4 27. Zhao Y, Hu Y, Smith JP, Strauss J, Yang G. Cohort profile: the China Health and  
13  
14 5 Retirement Longitudinal Study (CHARLS). *International journal of epidemiology* 2014; **43**(1):  
15  
16 6 61-8.  
17  
18  
19 7 28. Zhao Y, Strauss J, Yang G, et al. China Health And Retirement Longitudinal Study – 2011-  
20  
21 8 2012 National Baseline Users'Guide, 2013.  
22  
23  
24 9 29. Yuan B, Balabanova D, Gao J, Tang S, Guo Y. Strengthening public health services to  
25  
26 10 achieve universal health coverage in China. *Bmj* 2019; **365**: l2358.  
27  
28  
29 11 30. National Health and Family Planning Commission. China Health and Family Planning  
30  
31 12 Statistical Yearbook 2016. Beijing; 2016.  
32  
33  
34 13 31. Feng XL, Pang M, Beard J. Health system strengthening and hypertension awareness,  
35  
36 14 treatment and control: data from the China Health and Retirement Longitudinal Study. *Bulletin*  
37  
38 15 *of the World Health Organization* 2014; **92**(1): 29-41.  
39  
40  
41  
42 16 32. Meng Q, Fang H, Liu X, Yuan B, Xu J. Consolidating the social health insurance schemes  
43  
44 17 in China: towards an equitable and efficient health system. *The Lancet* 2015; **386**(10002): 1484-  
45  
46 18 92.  
47  
48  
49 19 33. National Bureau of Statistics of China. China Statistical Yearbook 2019. Beijing, 2019.  
50  
51  
52 20 34. National Bureau of Statistics of China. China Statistical Yearbook 2016. Beijing, 2016.  
53  
54  
55 21 35. Gelaye B, Williams MA, Lemma S, et al. Diagnostic validity of the composite international  
56  
57 22 diagnostic interview (CIDI) depression module in an East African population. *International*  
58  
59  
60

- 1 *journal of psychiatry in medicine* 2013; **46**(4): 387-405.
- 2 36. Masoomeh, Alimohammadian, Azam, et al. Multimorbidity as an important issue among
- 3 women: results of a gender difference investigation in a large population-based cross-sectional
- 4 study in West Asia. 2017.
- 5 37. Jankovic J, Mirkovic M, Jovic-Vranes A, Santric-Milicevic M, Terzic-Supic ZJPH.
- 6 Association between non-communicable disease multimorbidity and health care utilization in a
- 7 middle-income country: population-based study. 2018; **155**: 35-42.
- 8 38. Chen H, Chen Y, Cui B. The association of multimorbidity with healthcare expenditure
- 9 among the elderly patients in Beijing, China. *Arch Gerontol Geriatr* 2018; **79**: 32-8.
- 10 39. Yao S-S, Cao G-Y, Han L, et al. Associations Between Somatic Multimorbidity Patterns
- 11 and Depression in a Longitudinal Cohort of Middle-Aged and Older Chinese. *Journal of the*
- 12 *American Medical Directors Association* 2020: S1525-8610(19)30837-0.
- 13 40. Jin Y, Luo Y, He P. Hypertension, socioeconomic status and depressive symptoms in
- 14 Chinese middle-aged and older adults: Findings from the China health and retirement
- 15 longitudinal study. *Journal of Affective Disorders* 2019; **252**: 237-44.
- 16 41. Li X, Krumholz HM, Yip W, et al. Quality of primary health care in China: challenges and
- 17 recommendations. *Lancet* 2020; **395**(10239): 1802-12.
- 18 42. Liang D, Mays VM, Hwang WC. Integrated mental health services in China: challenges
- 19 and planning for the future. *Health Policy Plan* 2018; **33**(1): 107-22.
- 20 43. Zimmer Z, Kaneda T, Spess L. An examination of urban versus rural mortality in China
- 21 using community and individual data. *J Gerontol B Psychol Sci Soc Sci* 2007; **62**(5): S349-S57.
- 22 44. Barbabella F, Melchiorre MG, Quattrini S, Papa R, Lamura G. European Observatory

1  
2  
3  
4 1 Policy Briefs. In: Richardson E, van Ginneken E, eds. How can eHealth improve care for people  
5  
6 2 with multimorbidity in Europe? Copenhagen (Denmark): European Observatory on Health  
7  
8  
9 3 Systems and Policies

10  
11  
12 4 © NIVEL and TU Berlin 2017.; 2017.

13  
14 5 45. Qiu P, Caine ED, Hou F, Cerulli C, Wittink MN. Depression as seen through the eyes of  
15  
16 6 rural Chinese women: Implications for help-seeking and the future of mental health care in  
17  
18 7 China. *Journal of affective disorders* 2018; **227**: 38-47.

19  
20  
21  
22 8 46. Andresen EM, Malmgren JA, Carter WB, Patrick DL. Screening for depression in well older  
23  
24 9 adults: evaluation of a short form of the CES-D (Center for Epidemiologic Studies Depression  
25  
26 10 Scale). *Am J Prev Med* 1994; **10**(2): 77-84.

27  
28  
29  
30 11 47. Chen Y, Hicks A, While AE. Depression and related factors in older people in China: a  
31  
32 12 systematic review. *Reviews in Clinical Gerontology* 2012; **22**(1): 52-67.

33  
34  
35 13

1  
2  
3  
4  
5  
6  
7  
8  
9  
10  
11  
12  
13  
14  
15  
16  
17  
18  
19  
20  
21  
22  
23  
24  
25  
26  
27  
28  
29  
30  
31  
32  
33  
34  
35  
36  
37  
38  
39  
40  
41  
42  
43  
44  
45  
46  
47  
48  
49  
50  
51  
52  
53  
54  
55  
56  
57  
58  
59  
60

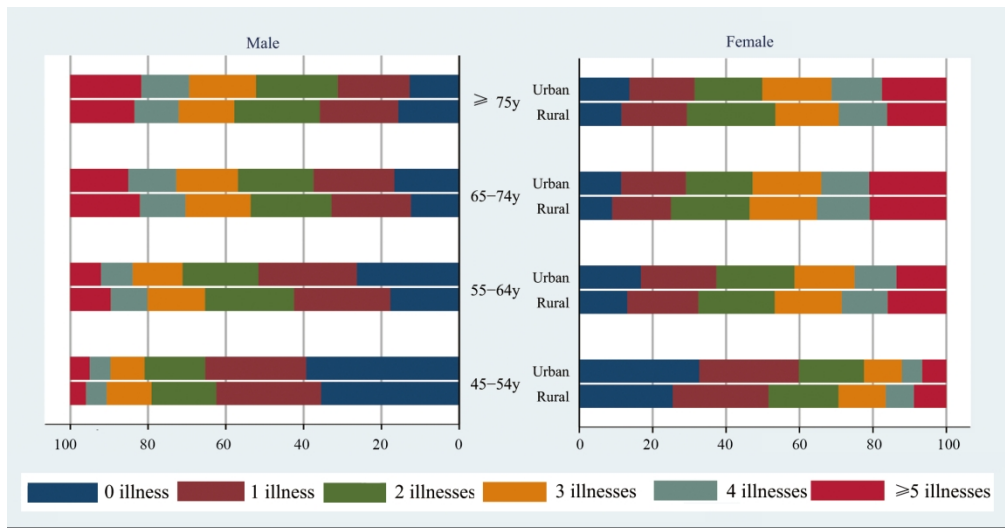

Figure 1. Weighted percentage of population subgroups by number of chronic illness, urbanity, sex and age  
180x93mm (300 x 300 DPI)

Appendix Table 1. Weighted prevalence of multimorbidity by sex, urbanity and age group

| Panel A. Male          | 45-54 years old |       | 55-64 years old |       | 65-74 years old |       | 75 years and above old |       |
|------------------------|-----------------|-------|-----------------|-------|-----------------|-------|------------------------|-------|
|                        | Urban           | Rural | Urban           | Rural | Urban           | Rural | Urban                  | Rural |
| No illness             | 42.6%           | 35.3% | 29.0%           | 17.8% | 17.5%           | 12.3% | 10.8%                  | 14.4% |
| Single illness         | 24.6%           | 26.7% | 25.4%           | 25.4% | 22.8%           | 20.2% | 16.4%                  | 21.1% |
| <b>Multimorbidity</b>  |                 |       |                 |       |                 |       |                        |       |
| Two illnesses          | 12.9%           | 17.1% | 17.6%           | 22.6% | 18.3%           | 20.8% | 19.9%                  | 21.7% |
| Three illnesses        | 11.4%           | 11.7% | 12.4%           | 15.0% | 14.6%           | 17.5% | 26.3%                  | 15.8% |
| Four illnesses         | 4.4%            | 5.2%  | 8.8%            | 8.9%  | 11.2%           | 11.3% | 10.2%                  | 11.2% |
| Five or more illnesses | 4.1%            | 3.9%  | 6.8%            | 10.3% | 15.6%           | 18.0% | 16.4%                  | 15.8% |
| Panel B. Female        | 45-54 years old |       | 55-64 years old |       | 65-74 years old |       | 75 years and above old |       |
|                        | Urban           | Rural | Urban           | Rural | Urban           | Rural | Urban                  | Rural |
| No illness             | 36.9%           | 25.2% | 17.3%           | 13.5% | 16.7%           | 8.8%  | 16.6%                  | 12.0% |
| Single illness         | 26.9%           | 27.0% | 23.0%           | 19.0% | 17.7%           | 15.9% | 15.1%                  | 18.4% |
| <b>Multimorbidity</b>  |                 |       |                 |       |                 |       |                        |       |
| Two illnesses          | 17.2%           | 19.4% | 20.5%           | 21.7% | 15.7%           | 21.3% | 23.0%                  | 23.4% |
| Three illnesses        | 8.9%            | 12.6% | 16.7%           | 18.4% | 17.1%           | 18.9% | 18.0%                  | 17.1% |
| Four illnesses         | 5.0%            | 7.6%  | 10.2%           | 12.2% | 11.4%           | 14.0% | 10.7%                  | 13.5% |
| Five or more illnesses | 5.1%            | 8.3%  | 12.3%           | 15.2% | 21.4%           | 21.1% | 16.6%                  | 15.7% |

Note: Individual weight with household and individual non-response adjustment was used to calculate the weighted prevalence.



**Appendix Table 2. Odds ratios (OR) for multimorbidity by age, sex, marital status, education, former smoking and alcohol consumption, health insurance status and urbanity**

|                         |                               | Ordered Logistic Model |               |
|-------------------------|-------------------------------|------------------------|---------------|
|                         |                               | Odds Ratio             | 95% CI        |
| Age (year)              |                               | Reference              |               |
|                         | 45-54                         | Reference              |               |
|                         | 55-64                         | 1.545                  | [1.439,1.659] |
|                         | 65-74                         | 2.238                  | [2.064,2.426] |
|                         | ≥75                           | 1.885                  | [1.690,2.103] |
| Sex                     |                               | Reference              |               |
|                         | Male                          | 1.672                  | [1.527,1.830] |
|                         | Female                        |                        |               |
| Educational level       |                               | Reference              |               |
|                         | Illiterate                    | 1.177                  | [1.082,1.281] |
|                         | Part of primary school        | 1.109                  | [1.019,1.206] |
|                         | Primary school                | 0.964                  | [0.882,1.054] |
|                         | Junior middle school          | 0.940                  | [0.844,1.047] |
|                         | Senior middle school or above |                        |               |
| Marital status          |                               | Reference              |               |
|                         | Not in marriage               | 0.850                  | [0.782,0.924] |
|                         | Married                       |                        |               |
| Smoking                 |                               | Reference              |               |
|                         | Current                       | 1.502                  | [1.379,1.636] |
|                         | Former                        | 0.940                  | [0.859,1.029] |
|                         | Never                         |                        |               |
| Alcohol consumption     |                               | Reference              |               |
|                         | Current                       | 1.828                  | [1.665,2.008] |
|                         | Former                        | 1.102                  | [1.028,1.181] |
|                         | Never                         |                        |               |
| Health insurance status |                               | Reference              |               |
|                         | Covered                       | Reference              |               |
|                         | Not covered                   | 0.854                  | [0.776,0.941] |
| Urbanity                |                               | Reference              |               |
|                         | Urban                         | Reference              |               |
|                         | Rural                         | 1.064                  | [1.003,1.128] |
| N                       |                               |                        | 16905         |

Note: Ordered logistic model was applied for five categories outcome which refers to absence or single illness, two illnesses, three illnesses, four illnesses, five illnesses or more.

## STROBE Statement—checklist of items that should be included in reports of observational studies

|                              | Item No. | Recommendation                                                                                                                                                                             | Page No. | Relevant text from manuscript |
|------------------------------|----------|--------------------------------------------------------------------------------------------------------------------------------------------------------------------------------------------|----------|-------------------------------|
| <b>Title and abstract</b>    | 1        | (a) Indicate the study's design with a commonly used term in the title or the abstract                                                                                                     | 2        | Cross-sectional               |
|                              |          | (b) Provide in the abstract an informative and balanced summary of what was done and what was found                                                                                        | 2        |                               |
| <b>Introduction</b>          |          |                                                                                                                                                                                            |          |                               |
| Background/rationale         | 2        | Explain the scientific background and rationale for the investigation being reported                                                                                                       | 4        |                               |
| Objectives                   | 3        | State specific objectives, including any prespecified hypotheses                                                                                                                           | 4        |                               |
| <b>Methods</b>               |          |                                                                                                                                                                                            |          |                               |
| Study design                 | 4        | Present key elements of study design early in the paper                                                                                                                                    | 4        |                               |
| Setting                      | 5        | Describe the setting, locations, and relevant dates, including periods of recruitment, exposure, follow-up, and data collection                                                            | 4        |                               |
| Participants                 | 6        | (a) <i>Cohort study</i> —Give the eligibility criteria, and the sources and methods of selection of participants. Describe methods of follow-up                                            | 4        |                               |
|                              |          | <i>Case-control study</i> —Give the eligibility criteria, and the sources and methods of case ascertainment and control selection. Give the rationale for the choice of cases and controls |          |                               |
|                              |          | <i>Cross-sectional study</i> —Give the eligibility criteria, and the sources and methods of selection of participants                                                                      |          |                               |
|                              |          | (b) <i>Cohort study</i> —For matched studies, give matching criteria and number of exposed and unexposed                                                                                   |          |                               |
|                              |          | <i>Case-control study</i> —For matched studies, give matching criteria and the number of controls per case                                                                                 |          |                               |
| Variables                    | 7        | Clearly define all outcomes, exposures, predictors, potential confounders, and effect modifiers. Give diagnostic criteria, if applicable                                                   | 4-5      |                               |
| Data sources/<br>measurement | 8*       | For each variable of interest, give sources of data and details of methods of assessment (measurement). Describe comparability of assessment methods if there is more than one group       | 4-5      |                               |
| Bias                         | 9        | Describe any efforts to address potential sources of bias                                                                                                                                  | 5        |                               |
| Study size                   | 10       | Explain how the study size was arrived at                                                                                                                                                  | 4        |                               |

Continued on next page

|                        |     |                                                                                                                                                                                                                                                                                                           |                |
|------------------------|-----|-----------------------------------------------------------------------------------------------------------------------------------------------------------------------------------------------------------------------------------------------------------------------------------------------------------|----------------|
| Quantitative variables | 11  | Explain how quantitative variables were handled in the analyses. If applicable, describe which groupings were chosen and why                                                                                                                                                                              | 5              |
| Statistical methods    | 12  | (a) Describe all statistical methods, including those used to control for confounding                                                                                                                                                                                                                     | 5              |
|                        |     | (b) Describe any methods used to examine subgroups and interactions                                                                                                                                                                                                                                       | Not applicable |
|                        |     | (c) Explain how missing data were addressed                                                                                                                                                                                                                                                               | 4              |
|                        |     | (d) <i>Cohort study</i> —If applicable, explain how loss to follow-up was addressed<br><i>Case-control study</i> —If applicable, explain how matching of cases and controls was addressed<br><i>Cross-sectional study</i> —If applicable, describe analytical methods taking account of sampling strategy | Not applicable |
|                        |     | (e) Describe any sensitivity analyses                                                                                                                                                                                                                                                                     | 5              |
| <b>Results</b>         |     |                                                                                                                                                                                                                                                                                                           |                |
| Participants           | 13* | (a) Report numbers of individuals at each stage of study—eg numbers potentially eligible, examined for eligibility, confirmed eligible, included in the study, completing follow-up, and analysed                                                                                                         | 5-6            |
|                        |     | (b) Give reasons for non-participation at each stage                                                                                                                                                                                                                                                      | 6              |
|                        |     | (c) Consider use of a flow diagram                                                                                                                                                                                                                                                                        |                |
| Descriptive data       | 14* | (a) Give characteristics of study participants (eg demographic, clinical, social) and information on exposures and potential confounders                                                                                                                                                                  |                |
|                        |     | (b) Indicate number of participants with missing data for each variable of interest                                                                                                                                                                                                                       |                |
|                        |     | (c) <i>Cohort study</i> —Summarise follow-up time (eg, average and total amount)                                                                                                                                                                                                                          |                |
| Outcome data           | 15* | <i>Cohort study</i> —Report numbers of outcome events or summary measures over time                                                                                                                                                                                                                       |                |
|                        |     | <i>Case-control study</i> —Report numbers in each exposure category, or summary measures of exposure                                                                                                                                                                                                      |                |
|                        |     | <i>Cross-sectional study</i> —Report numbers of outcome events or summary measures                                                                                                                                                                                                                        | 5-6            |
| Main results           | 16  | (a) Give unadjusted estimates and, if applicable, confounder-adjusted estimates and their precision (eg, 95% confidence interval). Make clear which confounders were adjusted for and why they were included                                                                                              | 6-7            |
|                        |     | (b) Report category boundaries when continuous variables were categorized                                                                                                                                                                                                                                 | 6-7            |
|                        |     | (c) If relevant, consider translating estimates of relative risk into absolute risk for a meaningful time period                                                                                                                                                                                          |                |

Continued on next page

|                          |    |                                                                                                                                                                            |      |                   |
|--------------------------|----|----------------------------------------------------------------------------------------------------------------------------------------------------------------------------|------|-------------------|
| Other analyses           | 17 | Report other analyses done—eg analyses of subgroups and interactions, and sensitivity analyses                                                                             | 5    |                   |
| <b>Discussion</b>        |    |                                                                                                                                                                            |      |                   |
| Key results              | 18 | Summarise key results with reference to study objectives                                                                                                                   | 9    |                   |
| Limitations              | 19 | Discuss limitations of the study, taking into account sources of potential bias or imprecision. Discuss both direction and magnitude of any potential bias                 | 9-10 |                   |
| Interpretation           | 20 | Give a cautious overall interpretation of results considering objectives, limitations, multiplicity of analyses, results from similar studies, and other relevant evidence | 9    |                   |
| Generalisability         | 21 | Discuss the generalisability (external validity) of the study results                                                                                                      | 9    |                   |
| <b>Other information</b> |    |                                                                                                                                                                            |      |                   |
| Funding                  | 22 | Give the source of funding and the role of the funders for the present study and, if applicable, for the original study on which the present article is based              | 10   | Funding Statement |

\*Give information separately for cases and controls in case-control studies and, if applicable, for exposed and unexposed groups in cohort and cross-sectional studies.

**Note:** An Explanation and Elaboration article discusses each checklist item and gives methodological background and published examples of transparent reporting. The STROBE checklist is best used in conjunction with this article (freely available on the Web sites of PLoS Medicine at <http://www.plosmedicine.org/>, Annals of Internal Medicine at <http://www.annals.org/>, and Epidemiology at <http://www.epidem.com/>). Information on the STROBE Initiative is available at [www.strobe-statement.org](http://www.strobe-statement.org).
