# Supplementary material for: Urban–rural disparity in prevalence of multimorbidity in China: a cross-sectional nationally representative study
Source: PubMed Central journal article supplement — BMJ Open. 2020 Nov 16;10(11):e038404. doi: 10.1136/bmjopen-2020-038404 (PMC7670952; doi:10.1136/bmjopen-2020-038404), 2020-11-16
Supplement: bmjopen-2020-038404supp001.pdf [file bmjopen-2020-038404supp001.pdf]

**Appendix Table 1. Weighted prevalence of multimorbidity by sex, urbanity and age group**

| Panel A. Male          | 45-54 years old |       | 55-64 years old |       | 65-74 years old |       | 75 years and above old |       |
|------------------------|-----------------|-------|-----------------|-------|-----------------|-------|------------------------|-------|
|                        | Urban           | Rural | Urban           | Rural | Urban           | Rural | Urban                  | Rural |
| No illness             | 42.6%           | 35.3% | 29.0%           | 17.8% | 17.5%           | 12.3% | 10.8%                  | 14.4% |
| Single illness         | 24.6%           | 26.7% | 25.4%           | 25.4% | 22.8%           | 20.2% | 16.4%                  | 21.1% |
| <b>Multimorbidity</b>  |                 |       |                 |       |                 |       |                        |       |
| Two illnesses          | 12.9%           | 17.1% | 17.6%           | 22.6% | 18.3%           | 20.8% | 19.9%                  | 21.7% |
| Three illnesses        | 11.4%           | 11.7% | 12.4%           | 15.0% | 14.6%           | 17.5% | 26.3%                  | 15.8% |
| Four illnesses         | 4.4%            | 5.2%  | 8.8%            | 8.9%  | 11.2%           | 11.3% | 10.2%                  | 11.2% |
| Five or more illnesses | 4.1%            | 3.9%  | 6.8%            | 10.3% | 15.6%           | 18.0% | 16.4%                  | 15.8% |
| Panel B. Female        | 45-54 years old |       | 55-64 years old |       | 65-74 years old |       | 75 years and above old |       |
|                        | Urban           | Rural | Urban           | Rural | Urban           | Rural | Urban                  | Rural |
| No illness             | 36.9%           | 25.2% | 17.3%           | 13.5% | 16.7%           | 8.8%  | 16.6%                  | 12.0% |
| Single illness         | 26.9%           | 27.0% | 23.0%           | 19.0% | 17.7%           | 15.9% | 15.1%                  | 18.4% |
| <b>Multimorbidity</b>  |                 |       |                 |       |                 |       |                        |       |
| Two illnesses          | 17.2%           | 19.4% | 20.5%           | 21.7% | 15.7%           | 21.3% | 23.0%                  | 23.4% |
| Three illnesses        | 8.9%            | 12.6% | 16.7%           | 18.4% | 17.1%           | 18.9% | 18.0%                  | 17.1% |
| Four illnesses         | 5.0%            | 7.6%  | 10.2%           | 12.2% | 11.4%           | 14.0% | 10.7%                  | 13.5% |
| Five or more illnesses | 5.1%            | 8.3%  | 12.3%           | 15.2% | 21.4%           | 21.1% | 16.6%                  | 15.7% |

Note: Individual weight with household and individual non-response adjustment was used to calculate the weighted prevalence.

**Appendix Table 2. Odds ratios (OR) for multimorbidity by age, sex, marital status, education, former smoking and alcohol consumption, health insurance status and urbanity**

|                               | Ordered Logistic Model |               |
|-------------------------------|------------------------|---------------|
|                               | Odds Ratio             | 95% CI        |
| Age (year)                    |                        |               |
| 45-54                         | Reference              |               |
| 55-64                         | 1.545                  | [1.439,1.659] |
| 65-74                         | 2.238                  | [2.064,2.426] |
| ≥75                           | 1.885                  | [1.690,2.103] |
| Sex                           | Reference              |               |
| Male                          | 1.672                  | [1.527,1.830] |
| Female                        |                        |               |
| Educational level             | Reference              |               |
| Illiterate                    | 1.177                  | [1.082,1.281] |
| Part of primary school        | 1.109                  | [1.019,1.206] |
| Primary school                | 0.964                  | [0.882,1.054] |
| Junior middle school          | 0.940                  | [0.844,1.047] |
| Senior middle school or above |                        |               |
| Marital status                | Reference              |               |
| Not in marriage               | 0.850                  | [0.782,0.924] |
| Married                       |                        |               |
| Smoking                       | Reference              |               |
| Current                       | 1.502                  | [1.379,1.636] |
| Former                        | 0.940                  | [0.859,1.029] |
| Never                         |                        |               |
| Alcohol consumption           | Reference              |               |
| Current                       | 1.828                  | [1.665,2.008] |
| Former                        | 1.102                  | [1.028,1.181] |
| Never                         |                        |               |
| Health insurance status       |                        |               |
| Covered                       | Reference              |               |
| Not covered                   | 0.854                  | [0.776,0.941] |
| Urbanity                      |                        |               |
| Urban                         | Reference              |               |
| Rural                         | 1.064                  | [1.003,1.128] |
| N                             |                        | 16905         |

Note: Ordered logistic model was applied for five categories outcome which refers to absence or single illness, two illnesses, three illnesses, four illnesses, five illnesses or more.
